# Supplementary material for: National and regional estimates of term and preterm babies born small for gestational age in 138 low-income and middle-income countries in 2010
Source: PubMed Central journal article supplement — Lancet Glob Health. 2013 Jul;1(1):e26–36. doi: 10.1016/S2214-109X(13)70006-8 (PMC4221634; doi:10.1016/s2214-109x(13)70006-8), 2013-07
Supplement: mmc1.pdf [file mmc1.pdf]

# THE LANCET Global Health

## Supplementary appendix

This appendix formed part of the original submission and has been peer reviewed. We post it as supplied by the authors.

Supplement to: Lee ACC, Katz J, Blencowe H, et al. National and regional estimates of term and preterm babies born small for gestational age in 138 low-income and middle-income countries in 2010. *Lancet Glob Health* 2013; **1**: e26–36.

**Web appendix 1: Identification of Child Health Epidemiology Reference Group (CHERG) Small for Gestational Age-Preterm Birth Cohorts**

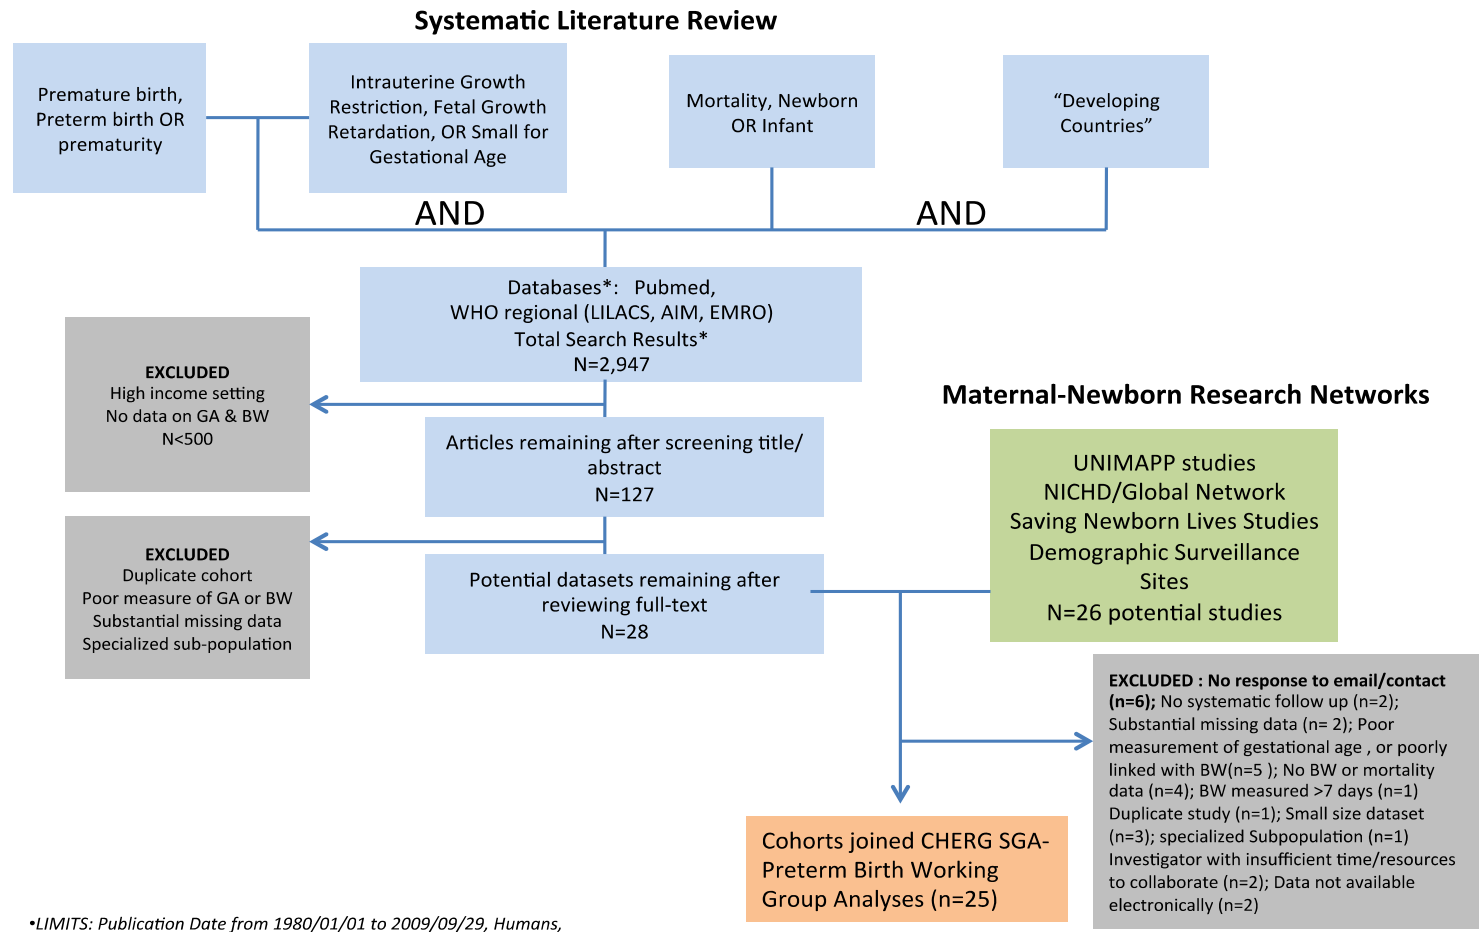

## Web appendix 2. Study Characteristics of Included CHERG Cohorts

| Study name                                       | Setting                                 | Primary study design                                                    | Population represented                                               | N (original cohort) | N (analyzed cohort) | NMR (per 1000 live births) | % LBW | % preterm | % SGA | % facility delivery | Method of gestational age assessment   |
|--------------------------------------------------|-----------------------------------------|-------------------------------------------------------------------------|----------------------------------------------------------------------|---------------------|---------------------|----------------------------|-------|-----------|-------|---------------------|----------------------------------------|
| Bangladesh (2001) <sup>1</sup>                   | Rural Gaibandha and Rangpur, BANGLADESH | Cluster RCT of maternal Vitamin A supplementation                       | Population based recruitment of all pregnant women in study area     | 18,250              | 12,984              | 51                         | 54    | 22        | 71    | 15                  | LMP                                    |
| Bangladesh (2005) <sup>2</sup>                   | Rural Sylhet, BANGLADESH                | Cluster RCT of community sepsis treatment                               | Population based recruitment of all pregnant women in study area     | 10,585              | 6,504               | 31                         | 30    | 19        | 50    | 6                   | LMP                                    |
| India (2000) <sup>3</sup>                        | Rural Tamil Nadu, INDIA                 | RCT of newborn Vitamin A supplementation                                | Population based recruitment of all pregnant women in study area     | 12,936              | 9,506               | 38                         | 33    | 14        | 62    | 63                  | LMP                                    |
| Nepal (1999) <sup>4</sup>                        | Rural Sarlahi, NEPAL                    | Cluster RCT of multiple micronutrient supplementation                   | Population based recruitment of all pregnant women in study area     | 4,130               | 3,319               | 42                         | 39    | 22        | 56    | 6                   | LMP                                    |
| Nepal (2003) <sup>5</sup>                        | Peri-Urban Dhanusha, NEPAL              | RCT of antenatal micronutrient supplementation                          | Antenatal clinic-based recruitment of pregnant women in study area   | 1,106               | 1,052               | 25                         | 22    | 7         | 53    | 53                  | Ultrasound                             |
| Nepal (2004) <sup>6</sup>                        | Rural Sarlahi, NEPAL                    | Cluster RCT of newborn skin-umbilical cord cleansing with chlorhexidine | Population based recruitment of all pregnant women in study area     | 23,662              | 21,792              | 32                         | 30    | 18        | 52    | 10                  | LMP                                    |
| Pakistan (2003) <sup>7</sup>                     | Rural Sindh, PAKISTAN                   | Cluster RCT of maternal micronutrient supplementation                   | Population based recruitment of all pregnant women in study villages | 1,548               | 1,434               | 18                         | 19    | 28        | 28    | 100                 | Ultrasound                             |
| Pakistan (2000) (Bhutta, personal communication) | Urban Karachi, PAKISTAN                 | Prospective birth cohort of inborn children                             | Tertiary Care Teaching Hospital, Aga Khan                            | 27,838              | 27,681              | NA                         | 12    | 12        | 22    | 100                 | LMP, early ultrasound on 75% of births |

**Web appendix 2. Study Characteristics of Included CHERG Cohorts (continued)**

| Study Name                        | Setting                                         | Primary Study design                                                                          | Population represented                                                | N (original cohort) | N (analyzed cohort) | NMR | % LBW | % preterm | % SGA | % facility delivery | Method of gestational age assessment                  |
|-----------------------------------|-------------------------------------------------|-----------------------------------------------------------------------------------------------|-----------------------------------------------------------------------|---------------------|---------------------|-----|-------|-----------|-------|---------------------|-------------------------------------------------------|
| Philippines (1983) <sup>8</sup>   | Urban Cebu, PHILLIPINES                         | Longitudinal Health-nutritional survey of infant feeding patterns                             | Population-based, random cluster sample of census                     | 3,080               | 2,785               | 14  | 11    | 18        | 25    | 34                  | LMP, Ballard to confirm                               |
| Thailand (2001) <sup>9</sup>      | Urban Bangkok, THAILAND                         | Prospective follow-up of birth cohort                                                         | Longitudinal birth cohort of all births in 4 districts                | 4,245               | 3,860               | 5   | 8     | 9         | 22    | 99                  | Best obstetric estimate (LMP, ultrasound or neonatal) |
| Burkina Faso (2004) <sup>10</sup> | Rural Hounde, BURKINA FASO                      | RCT of multiple micronutrient supplementation                                                 | Prospective, community-based cohort                                   | 1,373               | 1,060               | 21  | 17    | 16        | 35    | 77                  | Ultrasound at recruitment                             |
| Burkina Faso (2006) <sup>11</sup> | Rural Hounde, BURKINA FASO                      | RCT of maternal fortified food supplementation                                                | Prospective, community-based cohort                                   | 1,316               | 1,067               | 20  | 16    | 18        | 29    | 84                  | Ultrasound at recruitment                             |
| Kenya (1992) <sup>12</sup>        | Rural Assembo, KENYA                            | Clinical Malaria Trial                                                                        | Community-based, recruitment by census / traditional birth attendants | 1828                | 1,471               | 60  | 10    | 3         | 27    | 9                   | LMP, Ballard                                          |
| South Africa (2001) <sup>13</sup> | Rural Umkhanyakude, KwaZulu-Natal, SOUTH AFRICA | Non-randomized cohort intervention study of exclusive breastfeeding-HIV vertical transmission | Facility-based recruitment, 8 ANC clinics                             | 2811                | 2461                | 31  | 10    | 22        | 18    | 58                  | LMP, adjusted by clinical assessment                  |
| Tanzania (2001) <sup>14</sup>     | Urban Dar es Salaam, TANZANIA                   | RCT of multi-vitamin supplementation                                                          | Facility-based, ANC clinics                                           | 7,752               | 7,557               | 28  | 8     | 17        | 20    | 97                  | LMP                                                   |
| Tanzania (2008) <sup>15</sup>     | Rural Korogwe, TANZANIA                         | Observational malaria study                                                                   | Facility-based recruitment, ANC clinics, community follow-up          | 915                 | 777                 | 33  | 11    | 5         | 22    | 88                  | Ultrasound                                            |
| Uganda (2005) <sup>16</sup>       | Rural Kabale district, UGANDA                   | RCT Intermittent preventive malaria therapy and insecticide nets                              | Facility-based recruitment ANC clinics; only include facility births  | 1,561               | 1,477               | 17  | 7     | 6         | 10    | 100                 | Ballard external                                      |

**Web appendix 2. Study Characteristics of Included CHERG Cohorts (continued)**

| Study Name                  | Setting                                                | Primary Study design                 | Population represented                                                     | N (original cohort) | N (analyzed cohort) | NMR | % LBW | % preterm | % SGA | % facility delivery | Method of gestational age assessment                                |
|-----------------------------|--------------------------------------------------------|--------------------------------------|----------------------------------------------------------------------------|---------------------|---------------------|-----|-------|-----------|-------|---------------------|---------------------------------------------------------------------|
| Brazil (1982) <sup>17</sup> | Urban Pelotas city, Rio Grande do Sul, Southern BRAZIL | Longitudinal Birth Cohort Survey     | Population-based, all births in Pelotas hospitals (100% facility delivery) | 5,914               | 4,670               | 11  | 7     | 6         | 17    | 100                 | LMP                                                                 |
| Brazil (1993) <sup>18</sup> | Urban Pelotas city, Rio Grande do Sul, Southern BRAZIL | Longitudinal Birth Cohort Survey     | Population-based, all births in Pelotas hospitals (100% facility delivery) | 5,279               | 4,632               | 7   | 9     | 11        | 19    | 100                 | LMP and Dubowitz                                                    |
| Brazil (2004) <sup>19</sup> | Urban Pelotas city, Rio Grande do Sul, Southern BRAZIL | Longitudinal Birth Cohort Survey     | Population-based, all births in Pelotas hospitals (100% facility delivery) | 4,287               | 3,837               | 10  | 11    | 16        | 15    | 100                 | LMP, ultrasound if available, Dubowitz                              |
| Chile (2000) <sup>20</sup>  | CHILE                                                  | Birth registry                       | Population-based                                                           | 1,901,611           | 1,898,250           | 5   | 6     | 7         | 7     | 98                  | Best obstetric estimate (LMP corrected by ultrasound before 20 wks) |
| Peru (1995) <sup>21</sup>   | Urban shantytown, Lima, PERU                           | RCT of maternal zinc supplementation | Facility-based                                                             | 978                 | 966                 | 0   | 4     | 5         | 11    | 100                 | LMP, clinical indications, ultrasound if available                  |

NMR = neonatal mortality rate, neonatal deaths per 1000 live births, SGA = small for gestational age, LBW = low birthweight, RCT = randomized control trial, ANC = antenatal care, LMP = Last menstrual period

### **Web Appendix 3: Identification of published literature reporting Small for Gestational Age (Alexander reference<sup>22</sup>) and Low Birthweight prevalence**

#### **Search 1: Medline search**

(prevalence OR incidence) AND ("low birth weight" OR "low birthweight" OR lbw) AND ("Infant, Small for Gestational Age"[Mesh] OR "Fetal Growth Retardation"[Mesh] OR "small for gestational age"[All Fields] OR "small-for-gestational-age"[All Fields] OR "SGA"[All Fields] OR "intrauterine growth retardation"[All Fields] OR "intrauterine growth restriction"[All Fields] OR "IUGR"[All Fields] OR "small for age"[All Fields] OR "small-for-age"[All Fields]) AND ("developing countries" OR "low-income countries" OR ("Developing Countries"[Mesh] OR "developing country"[All Fields] OR "developing countries"[All Fields] OR "developing nation"[All Fields] OR "developing nations"[All Fields] OR "under-developed country"[All Fields] OR "under-developed countries"[All Fields] OR "under developed country"[All Fields] OR "under developed countries"[All Fields] OR "under-developed nations"[All Fields] OR "under developed nations"[All Fields] OR "third world country"[All Fields] OR "third world countries"[All Fields] OR "third world nation"[All Fields] OR "third world nations"[All Fields] OR "less developed country"[All Fields] OR "less developed countries"[All Fields] OR "less-developed country"[All Fields] OR "less-developed countries"[All Fields] OR "less developed nations"[All Fields] OR "less-developed nations"[All Fields] OR "Low Resource Setting"[All Fields] OR "Low Resource Settings"[All Fields] OR [*extended individual country list available upon request*]) **[352 studies]**

**Search 2:** Scopus search identifying all published articles that have cited the Alexander reference small-for-gestational-age publication<sup>22</sup>

**760 studies**

**Final total for publications reporting LBW and SGA prevalence using Alexander reference: six<sup>23-28</sup>**

**Web appendix 4.** Description of the WHO Global Survey<sup>29</sup> facility-based data points included

| Country      | Study year | N      | % LBW | % Preterm | % SGA | NMR <sup>1</sup> | %Facility delivery <sup>2</sup> |
|--------------|------------|--------|-------|-----------|-------|------------------|---------------------------------|
| Algeria      | 2004       | 10,952 | 6.1%  | 5.8%      | 11.2% | 20.3             | 95                              |
| Angola       | 2004       | 1,809  | 6.9%  | 5.7%      | 20.3% | 46.6             | 46                              |
| Argentina    | 2004       | 9,528  | 8.6%  | 9.6%      | 10.9% | 9.6              | 99                              |
| Brazil       | 2004       | 11,795 | 10.0% | 8.8%      | 17.4% | 15.3             | 98                              |
| Cambodia     | 2007       | 5,187  | 8.6%  | 7.0%      | 26.8% | 28.3             | 22                              |
| China        | 2007       | 8,967  | 5.4%  | 6.7%      | 10.4% | 14.2             | 92                              |
| Cuba         | 2004       | 10,360 | 5.9%  | 5.3%      | 14.1% | 3.5              | 100                             |
| DR Congo     | 2004       | 3,399  | 14.0% | 13.8%     | 22.9% | 48.9             | 70                              |
| Ecuador      | 2004       | 9,137  | 12.1% | 8.3%      | 26.0% | 12.6             | 74                              |
| India        | 2007       | 16,821 | 25.1% | 14.8%     | 50.1% | 35.2             | 39                              |
| Kenya        | 2004       | 15,375 | 9.1%  | 11.9%     | 19.9% | 30.5             | 39                              |
| Mexico       | 2004       | 18,572 | 8.6%  | 8.5%      | 18.2% | 9.8              | 86                              |
| Nepal        | 2007       | 7,835  | 12.6% | 9.4%      | 34.9% | 30.9             | 18                              |
| Nicaragua    | 2004       | 5,066  | 8.5%  | 7.3%      | 18.5% | 16               | 74                              |
| Niger        | 2004       | 754    | 10.7% | 7.6%      | 29.3% | 38.1             | 17                              |
| Nigeria      | 2004       | 1,956  | 8.3%  | 10.2%     | 20.9% | 42.6             | 35                              |
| Paraguay     | 2004       | 2,682  | 7.4%  | 10.3%     | 10.0% | 16.1             | 85                              |
| Peru         | 2004       | 13,193 | 8.5%  | 9.7%      | 10.5% | 11.6             | 72                              |
| Phillippines | 2007       | 10,915 | 16.2% | 8.7%      | 34.8% | 13.7             | 44                              |
| Sri Lanka    | 2007       | 14,276 | 14.4% | 7.3%      | 33.2% | 8.9              | 98                              |
| Thailand     | 2007       | 9,098  | 10.2% | 11.2%     | 17.3% | 8.6              | 97                              |
| Uganda       | 2004       | 12,095 | 6.4%  | 8.4%      | 12.9% | 32.4             | 41                              |
| Vietnam      | 2007       | 7,573  | 5.7%  | 4.5%      | 17.5% | 13.6             | 64                              |

LBW = low birthweight, SGA = small for gestational age, NMR = neonatal mortality rate, neonatal deaths per 1000 live births

1 Neonatal mortality rates were not available for study data points, thus national NMRs were used from the UN-IGME for the year of the initial year of the survey<sup>30</sup>.

2 Facility delivery rates not available for study area and thus national delivery care coverage (institutional delivery) from 2003-2008 were taken from UNICEF State of the Children's Report 2010.<sup>31</sup>

## Web appendix 5. Formula for random-effects regression

$$\text{logit}(\text{PrTSGA}_{ijt}) = \alpha + \beta \ln(\text{PrLBW}_{ijt}) + \sum \gamma X_i + \sum \lambda Y_{it} + \eta_j + \varepsilon_{jt}$$

PrTSGA=prevalence of term small-for-gestational-age babies

PrLBW=prevalence of low-birthweight babies

i=source

j=region

t=study year

$\alpha, \beta, \gamma, \lambda$ =coefficients of parameters to be estimated

X=set of dummy variables for population selection/bias

Y=set of predictor variables representing socioeconomic factors and health care use for source (i) and year (t)

$\eta$ =random region effect, assumed to be normally distributed

$\varepsilon$ =normally distributed error term



## Web appendix 6: Comparison of Final Models for logit(term-SGA prevalence)

In the cross validation, the study data were randomly divided into five subsamples. One subsample was withheld while modeling was conducted on the remaining 80% of the data. This was repeated with each successive subsample withheld, and a summary measure of the prediction error was generated for the entire dataset. The standardized error term was calculated as  $(\text{observed} - \text{predicted})^2 / \text{variance}$ . The final model selected was that which had the lowest prediction error based on the standardized error term.

| Model | Dependent Variable | Covariates                         | Adj R-squared | Out of Model Prediction error <sup>1</sup> |
|-------|--------------------|------------------------------------|---------------|--------------------------------------------|
| 1     | Logit TSGA         | lnLBW, population recruitment      | 0.7966        | 73,608                                     |
| 2     | Logit TSGA         | lnLBW, population recruitment, NMR | 0.8237        | 70,836                                     |

TSGA = Term-Small for gestational age, LBW = low birthweight, NMR = neonatal mortality rate, neonatal deaths per 1000 live births

<sup>1</sup> Sum of  $(\text{observed} - \text{predicted})^2 / \text{variance}$  for each study dataset with out of prediction modeling excluding 20% of studies x 5

## Web appendix 7.

### Prevalence of Small-for-Gestational-Age Comparing Datasets with versus without Imputation of Missing

#### Birth weights

##### *Imputation Methods and Results*

Two imputation strategies were developed to impute weights that were either: 1) completely missing, or 2) measured after the time of birth in community datasets. For weights measured from birth up to 10 days of life that had information on the hour of weighing, weights were adjusted to reflect their actual weight at time of birth taking into account a newborn's weight changes over time -- ie. dropping over the first few days and increasing beyond that. Key weight predictor variables (gestational age, gender, and vital status) were also used to adjust the weight. Weights taken beyond ten days were coded as missing. If exact hour of weighing was unavailable or if the time of weighing was taken within a very short range of time, weights taken within 72 hours were used, while all other weights were set as missing. Missing weights were multiply imputed using the aforementioned predictor variables. The "mi" command in Stata was used. The prevalences of term-SGA among live births, and SGA among preterm live births were compared with vs. without the imputed birth weights and are shown in the below table. There was no significant difference in the prevalence for either term-SGA or SGA among preterm births. More details are available in a separate publication.<sup>32</sup>

|                     | Prevalence Term-SGA<br>(% of total live births) |         | Prevalence SGA among<br>preterm live births (%) |         |
|---------------------|-------------------------------------------------|---------|-------------------------------------------------|---------|
|                     | Unimputed                                       | Imputed | Unimputed                                       | Imputed |
| Bangladesh (2005)   | 45.2                                            | 46.5    | 17.7                                            | 17.6    |
| India (2000)        | 58.5                                            | 58.5    | 22.3                                            | 21.8    |
| Nepal (1999)        | 51.0                                            | 51.0    | 23.9                                            | 20.6    |
| Nepal (2004)        | 47.8                                            | 46.7    | 25.1                                            | 22.2    |
| Burkina Faso (2004) | 32.5                                            | 31.7    | 17.6                                            | 15.2    |
| Kenya (1995)        | 25.1                                            | 25.7    | 38.6                                            | 38.8    |

## Web appendix 8

Low birthweight rates were obtained from several sources and taken in order of the following hierarchy: 1) National Statistics Offices databases ([http://unstats.un.org/unsd/methods/inter-natlinks/sd\\_natstat.asp](http://unstats.un.org/unsd/methods/inter-natlinks/sd_natstat.asp)), 2) WHO regional databases (<http://www.emro.who.int/entity/statistics/data-and-statistics.html>; <http://data.euro.who.int/hfad/>; <http://www.wpro.who.int/publications/databases/en/>), 3) UNICEF State of the World's Children (<http://www.unicef.org/sowc/>), and 4) World Bank (<http://data.worldbank.org/topic/health>). In countries with available LBW data points for more than half of the years 1990 – 2010, with at least one data point before 1995 and one after 2005, a Loess regression using that country's data was conducted to estimate the LBW rate in 2010. If these criteria were not met, the last available data point was used for the 2010 estimate.

## **Web appendix 9**

### ***Methods of Uncertainty Estimation***

For term-SGA, we generated uncertainty estimates by drawing 1000 bootstrapped samples from the modeling dataset, and repeating each step of the estimation process. For each bootstrapped sample, we ran the model and generated a new set of predicted national estimates for the prevalence of term-SGA, including random effects at the regional level. For national level estimates we chose the 2.5 and 97.5 centiles of the 1000 predictions for our uncertainty bounds. To obtain uncertainty ranges for regional- and global-level estimates, we summed the relevant national estimates derived from each bootstrap sample, choosing the 2.5 and 97.5 centiles of the resulting distributions.

For preterm-SGA, we had three sources of uncertainty – 1) the number of preterm babies; 2) the proportion of preterm infants of gestation  $<32$  or  $\geq 32$  weeks, and 3) the proportion of SGA within these preterm categories. From our prior analysis, 1000 bootstrapped estimates of preterm prevalence were available for each country and uncertainty estimates for the proportion of preterm infants of gestational  $<32$  weeks, and  $\geq 32$  weeks.<sup>33</sup> For the meta-analyzed estimates of proportions (proportion of preterm infants  $<32$  weeks, proportion of preterm infants  $\geq 32$  weeks, proportion of  $<32$  week babies who were SGA, and proportion of  $\geq 32$  week babies who were SGA), we generated normal distributions of the meta-estimates, and randomly drew 1000 samples from these distributions. We then selected the 2.5 and 97.5 centiles of the products of these 1000 samples as the preterm-SGA uncertainty bounds. For the uncertainty of all SGA, we used the 2.5 and 97.5 centiles of the sum of term-SGA and preterm-SGA from the 1000 samples.

Web appendix 10: Search Strategy for Small-for-Gestational-Age prevalence (Alexander reference)<sup>22</sup>

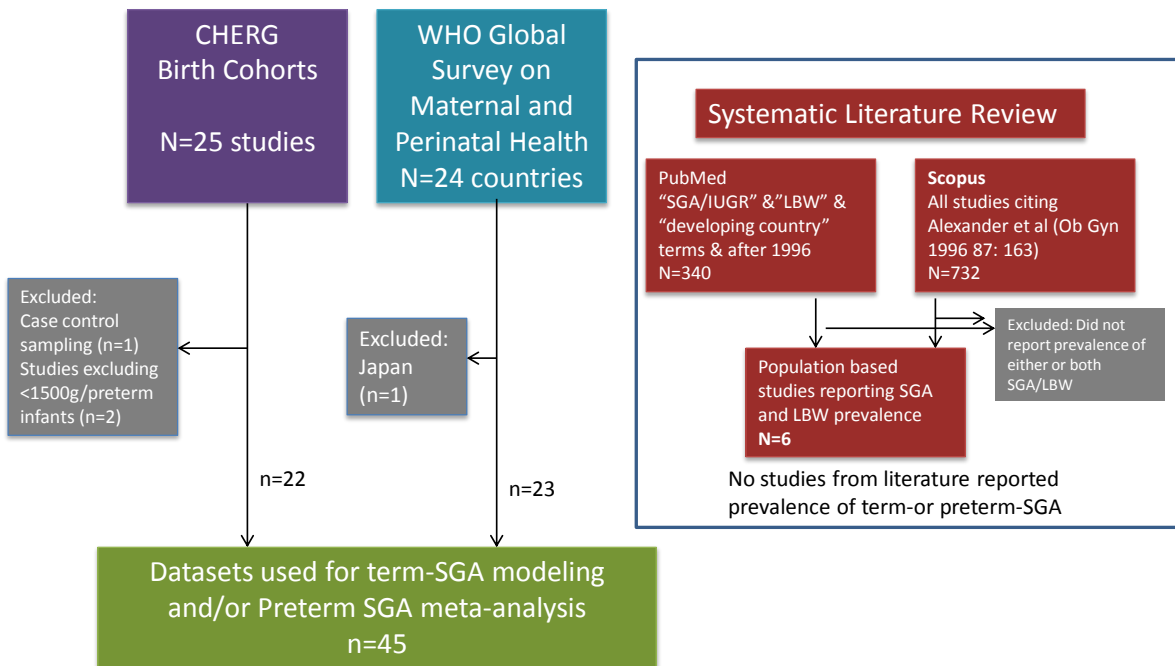

\*Detailed search strategy for purple box (“CHERG Birth Cohorts”) presented in Web Appendix 1, detailed search strategy for right hand box (“Systematic Literature Review”) presented in Web Appendix 3



**Web appendix 12a) Meta-analysis of prevalence of small-for-gestational-age among moderate to late (32-37 weeks) preterm infants**

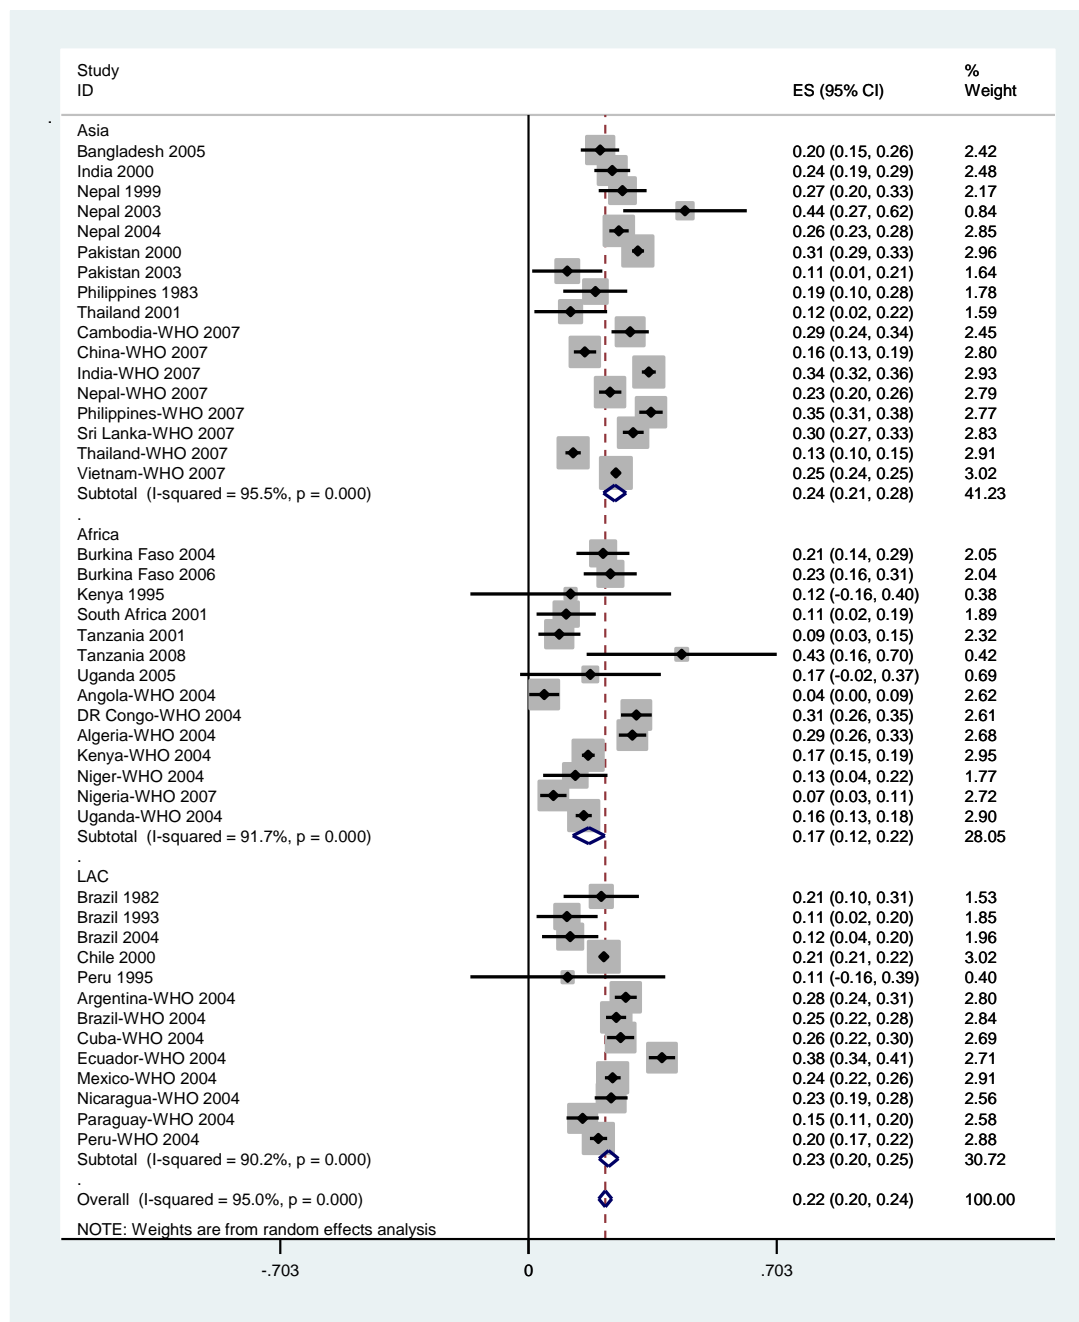

Included a total of 44 datasets and 151,766 moderate to late preterm births (Asia: 17 datasets, 33,747 moderate to late preterm births; Africa: 14 datasets, 5,979 moderate to late preterm births; Latin America/Caribbean: 13 datasets, 151,766 moderate to late preterm births)

**Web appendix 12b) Prevalence of SGA among moderate-late (32-37weeks) infants in Asia:**

**Population-based vs. Facility-based Studies**

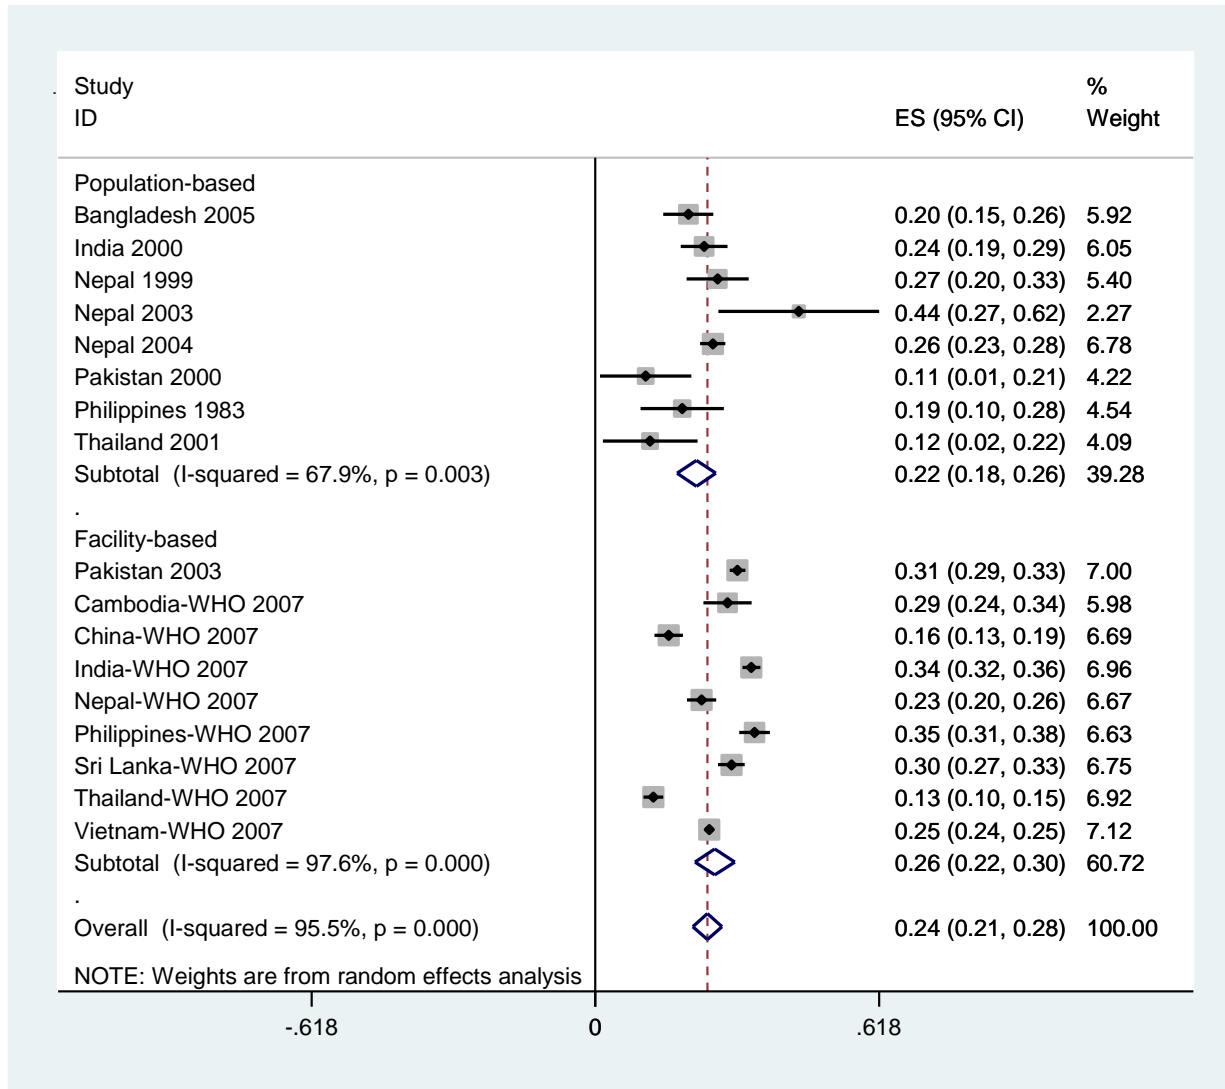

Includes a total of 17 datasets, 33,747 moderate to late preterm births (8 population-based datasets, 8,117 moderate to late preterm births; 9 facility-based datasets, 41,864 moderate to late preterm births).



**Web appendix 12c) Prevalence of SGA among moderate-late (32-<37 weeks): Higher Quality Studies**

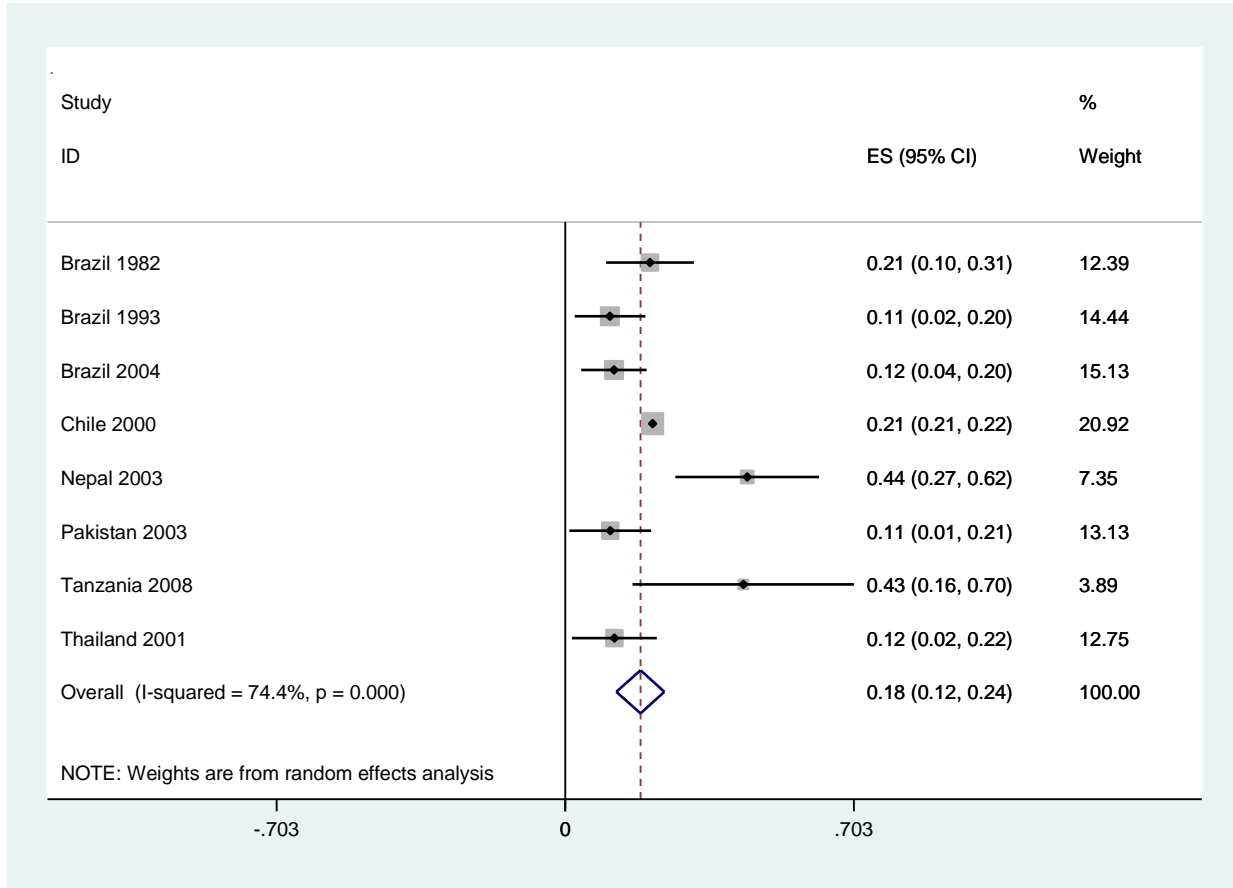

Includes a total of 8 studies, 109,420 moderate to late preterm births.

**Web appendix 13a) Meta-analyses of the prevalence of SGA among preterm infants in early preterm (<32 week) infants, Population- vs Facility-based studies in Asia**

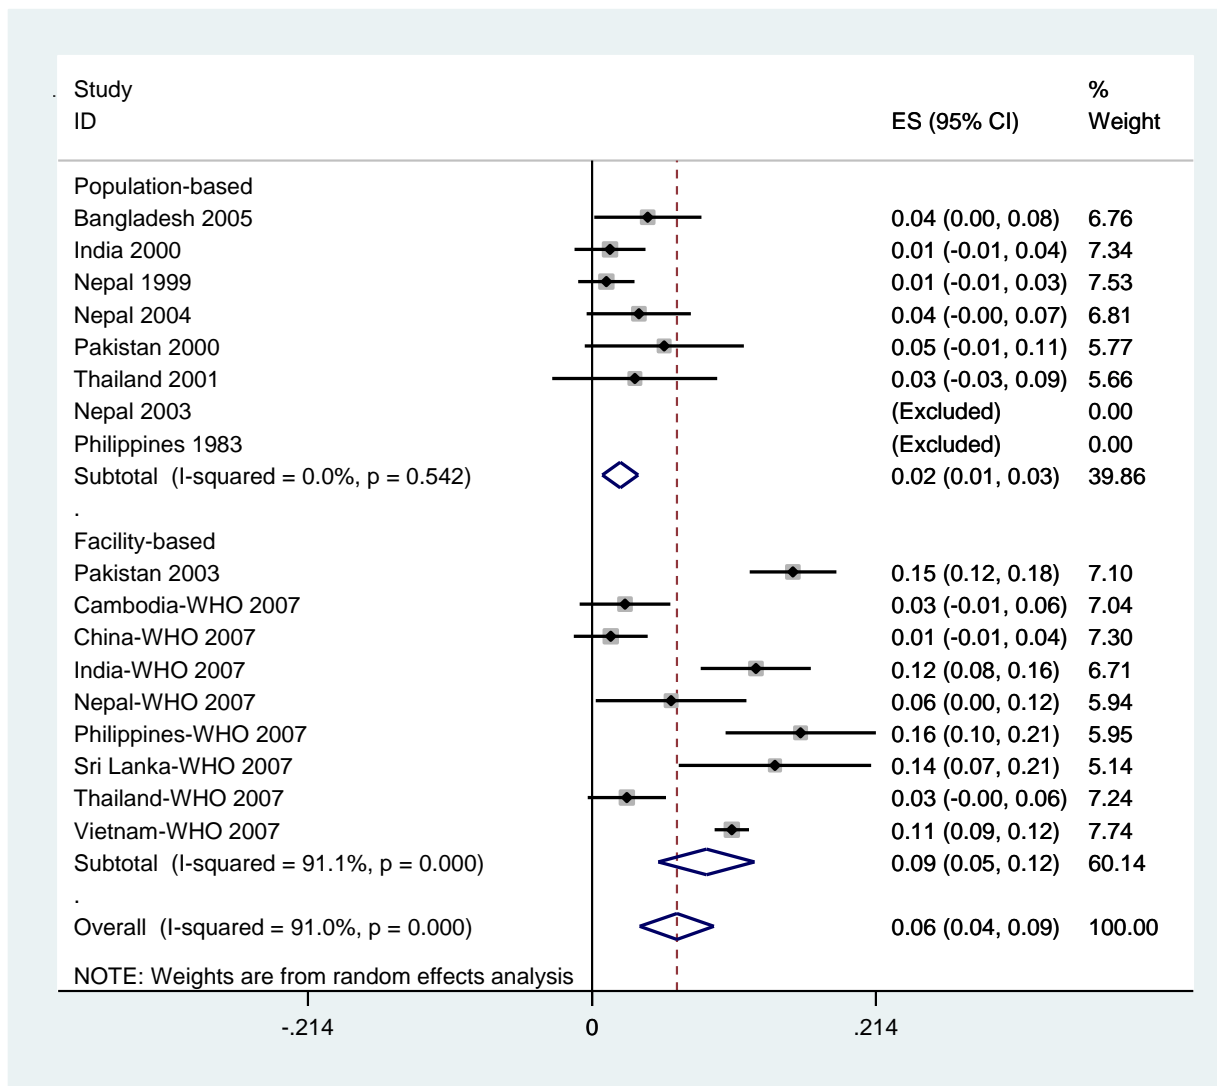

Includes a total of 15 datasets, 4,862 early preterm births (6 population-based datasets, 469 early preterm births; 9 facility-based datasets, 4,393 early preterm births).

**Web appendix 13b) Meta-analyses of the prevalence of SGA among preterm infants in early preterm (<32 week) infants, Higher Quality Studies**

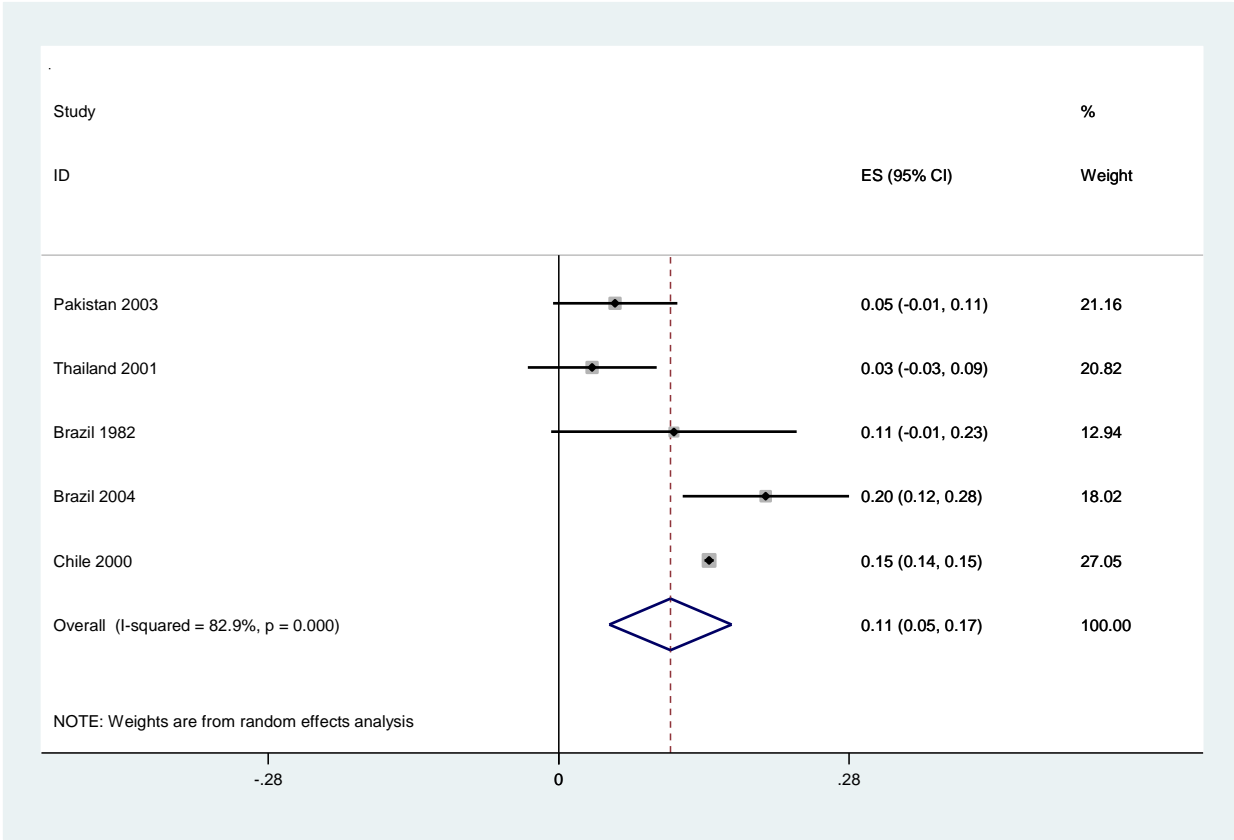

Legend: Meta-analysis of 5 studies including 18,673 early preterm births

References: Brazil 1982<sup>17</sup>, Brazil 2004<sup>19,20</sup>, Chile 2000<sup>62</sup>, Pakistan 2003<sup>7</sup>, Thailand 2001<sup>9</sup>

**Web appendix 14. Estimates of Small for Gestational Age-Preterm Birth for 138 Low- and Middle-Income Countries by UN-MDG Regions for 2010**

| Numbers of Live Births in 2010  |                    |                   |                   |                   |                            |                   |                            |                  |                         |
|---------------------------------|--------------------|-------------------|-------------------|-------------------|----------------------------|-------------------|----------------------------|------------------|-------------------------|
|                                 | Births 2010        | LBW               | Preterm           | SGA               |                            | TSGA              |                            | PSGA             |                         |
| Caucasus and Central Asia       | 1,643,100          | 101,000           | 151,300           | 240,700           | (169800-342400)            | 207,000           | (136300-306900)            | 33,700           | (21400-47900)           |
| Eastern Asia                    | 17,490,400         | 445,200           | 1,262,200         | 1,182,300         | (720700-1975000)           | 900,900           | (453400-1714300)           | 281,400          | (194700-356400)         |
| Latin America and the Caribbean | 10,844,500         | 858,100           | 929,300           | 1,374,000         | (1029700-1788900)          | 1,180,100         | (850600-1580600)           | 193,900          | (152900-277200)         |
| Northern Africa                 | 3,543,000          | 193,500           | 259,200           | 337,600           | (239400-461400)            | 296,000           | (201200-415300)            | 41,600           | (24500-65200)           |
| Oceania                         | 263,100            | 26,000            | 19,400            | 55,300            | (42700-72000)              | 51,000            | (38300-66700)              | 4,300            | (2500-9200)             |
| South-eastern Asia              | 10,983,400         | 1,339,100         | 1,497,400         | 2,670,200         | (2143400-3318900)          | 2,336,400         | (1832800-2976500)          | 333,900          | (219900-472600)         |
| Southern Asia                   | 38,753,000         | 9,970,400         | 5,159,100         | 17,350,300        | (15600000-19400000)        | 16,200,000        | (14600000-18300000)        | 1,150,300        | (829200-1479700)        |
| Sub-Saharan Africa              | 32,085,500         | 4,550,600         | 3,936,700         | 8,157,300         | (6943600-9215500)          | 7,525,200         | (6356700-8541500)          | 632,200          | (433100-887200)         |
| Western Asia                    | 4,855,300          | 537,700           | 488,200           | 1,066,900         | (863100-1334300)           | 958,100           | (753900-1226800)           | 108,900          | (71600-156400)          |
| <b>LMIC TOTAL</b>               | <b>120,461,300</b> | <b>18,021,600</b> | <b>13,702,800</b> | <b>32,434,800</b> | <b>(29001600-36742300)</b> | <b>29,654,600</b> | <b>(26147800-33847900)</b> | <b>2,780,100</b> | <b>(2114200-347700)</b> |

| Birth Prevalence (per 100 live births) in 2010 |                    |             |             |             |                    |             |                    |            |                  |
|------------------------------------------------|--------------------|-------------|-------------|-------------|--------------------|-------------|--------------------|------------|------------------|
|                                                | Births 2010        | LBW         | Preterm     | SGA         |                    | TSGA        |                    | PSGA       |                  |
| Caucasus and Central Asia                      | 1,643,100          | 6.3         | 9.5         | 15.0        | (10.6-21.4)        | 12.9        | (8.5-19.2)         | 2.1        | (1.3-3)          |
| Eastern Asia                                   | 17,490,400         | 2.6         | 7.4         | 7.0         | (4.2-11.6)         | 5.3         | (2.7-10.1)         | 1.7        | (1.1-2.1)        |
| Latin America and the Caribbean                | 10,844,500         | 7.8         | 8.4         | 12.5        | (9.4-16.3)         | 10.7        | (7.7-14.4)         | 1.8        | (1.4-2.5)        |
| Northern Africa                                | 3,543,000          | 5.5         | 7.4         | 9.6         | (6.8-13.2)         | 8.5         | (5.7-11.9)         | 1.2        | (0.7-1.9)        |
| Oceania                                        | 263,100            | 9.9         | 7.4         | 21.0        | (16.2-27.4)        | 19.4        | (14.6-25.3)        | 1.6        | (1-3.5)          |
| South-eastern Asia                             | 10,983,400         | 12.2        | 13.6        | 24.3        | (19.5-30.2)        | 21.2        | (16.7-27.1)        | 3.0        | (2-4.3)          |
| Southern Asia                                  | 38,753,000         | 25.6        | 13.2        | 44.5        | (40-49.7)          | 41.5        | (37.4-46.9)        | 2.9        | (2.1-3.8)        |
| Sub-Saharan Africa                             | 32,085,500         | 14.2        | 12.3        | 25.5        | (21.7-28.8)        | 23.5        | (19.9-26.7)        | 2.0        | (1.4-2.8)        |
| Western Asia                                   | 4,855,300          | 11.0        | 10.0        | 21.8        | (17.6-27.2)        | 19.6        | (15.4-25)          | 2.2        | (1.5-3.2)        |
| <b>LMIC TOTAL</b>                              | <b>120,461,300</b> | <b>15.0</b> | <b>11.4</b> | <b>27.0</b> | <b>(24.1-30.5)</b> | <b>24.7</b> | <b>(21.7-28.1)</b> | <b>2.3</b> | <b>(1.7-2.9)</b> |

**Web appendix 15. National Estimates of Small for Gestational Age-Preterm Birth for 138 Low- and Middle-Income Countries for 2010**

| Country                  | Birth Prevalence (per 100 live births) in 2010 |                       |                  |                            |                  |                  |               |                             |                            |                         | Number of Live Births 2010 |           |           |  |  |  |
|--------------------------|------------------------------------------------|-----------------------|------------------|----------------------------|------------------|------------------|---------------|-----------------------------|----------------------------|-------------------------|----------------------------|-----------|-----------|--|--|--|
|                          | Live births 2010 <sup>1</sup>                  | NMR 2010 <sup>2</sup> | LBW <sup>3</sup> | Preterm Birth <sup>4</sup> | SGA (UR)         | TSGA (UR)        | PSGA (UR)     | SGA (UR)                    | TSGA (UR)                  | PSGA (UR)               | SGA (UR)                   | TSGA (UR) | PSGA (UR) |  |  |  |
| Afghanistan              | 1.40E+06                                       | 36.8                  | 20.0             | 11.5                       | 40.0 (34.6-45.6) | 37.4 (32.3-42.6) | 2.6 (1-5.3)   | 553,600 (484900-637900)     | 518,000 (452900-596700)    | 35,700 (14700-73700)    |                            |           |           |  |  |  |
| Algeria                  | 714400                                         | 17.2                  | 5.8              | 7.4                        | 10.6 (7.7-14.2)  | 9.4 (6.7-12.8)   | 1.2 (0.7-2.3) | 75,800 (55200-101600)       | 67,300 (48100-91600)       | 8,500 (4700-16800)      |                            |           |           |  |  |  |
| Angola                   | 794700                                         | 43.8                  | 12.4             | 12.5                       | 25.6 (21.9-29.5) | 23.6 (20-27.2)   | 2.0 (0.8-4.1) | 203,300 (174000-234200)     | 187,400 (158900-215900)    | 15,900 (6400-32600)     |                            |           |           |  |  |  |
| Antigua and Barbuda      | 1600                                           | 4.4                   | 5.8              | 5.8                        | 9.0 (6.1-12.7)   | 7.7 (5-11.3)     | 1.3 (0.8-2.5) | 100 (100-200)               | 100 (100-200)              | 21 (12-40)              |                            |           |           |  |  |  |
| Argentina                | 693500                                         | 7.7                   | 7.1              | 8.0                        | 11.3 (8.2-15)    | 9.6 (6.6-13.4)   | 1.7 (1.5-1.9) | 78,100 (57200-104200)       | 66,600 (45900-92800)       | 11,600 (10200-13000)    |                            |           |           |  |  |  |
| Armenia                  | 47300                                          | 11.5                  | 7.4              | 11.0                       | 16.4 (11.5-22.5) | 13.9 (9.4-20.1)  | 2.5 (1-5.3)   | 7,800 (5500-10600)          | 6,600 (4500-9500)          | 1,200 (500-2500)        |                            |           |           |  |  |  |
| Azerbaijan               | 182000                                         | 19.7                  | 6.9              | 8.5                        | 16.2 (11.4-22.5) | 14.3 (9.8-20.6)  | 1.9 (1-4.1)   | 29,500 (20700-40900)        | 26,100 (17800-37500)       | 3,400 (1800-7400)       |                            |           |           |  |  |  |
| Bahamas                  | 5300                                           | 7.3                   | 11.6             | 9.5                        | 16.7 (12.5-21.7) | 14.7 (10.6-19.3) | 2.0 (1.3-3.7) | 900 (700-1200)              | 800 (600-1000)             | 100 (100-200)           |                            |           |           |  |  |  |
| Bahrain                  | 22900                                          | 3.9                   | 9.9              | 14.0                       | 19.6 (14.4-25.9) | 16.5 (11.6-22.8) | 3.1 (2-4.2)   | 4,500 (3300-5900)           | 3,800 (2700-5200)          | 700 (500-1000)          |                            |           |           |  |  |  |
| Bangladesh               | 3.00E+06                                       | 27.5                  | 21.6             | 14.0                       | 39.6 (35.7-45.6) | 36.5 (32.6-42.1) | 3.1 (2.2-4.3) | 1,203,000 (1071800-1369200) | 1,108,500 (977700-1262100) | 94,600 (66400-128500)   |                            |           |           |  |  |  |
| Barbados                 | 3000                                           | 9.9                   | 11.7             | 8.9                        | 17.3 (12.9-22)   | 15.2 (11.1-19.7) | 2.1 (1.2-3.3) | 500 (400-700)               | 500 (300-600)              | 100 (0-100)             |                            |           |           |  |  |  |
| Belize                   | 7700                                           | 8.5                   | 14.4             | 10.4                       | 20.0 (15.4-25.6) | 17.8 (13.1-23)   | 2.2 (1.5-4)   | 1,500 (1200-2000)           | 1,400 (1000-1800)          | 200 (100-300)           |                            |           |           |  |  |  |
| Benin                    | 350300                                         | 31.3                  | 14.9             | 10.6                       | 25.8 (21.5-29.4) | 24.1 (20-27.6)   | 1.7 (0.9-3.6) | 90,300 (75400-103100)       | 84,400 (70000-96500)       | 5,900 (3300-12500)      |                            |           |           |  |  |  |
| Bhutan                   | 14900                                          | 25.4                  | 9.3              | 10.2                       | 21.7 (16.5-28.8) | 19.5 (14.5-25.6) | 2.2 (0.9-5)   | 3,200 (2500-4300)           | 2,900 (2200-3800)          | 300 (100-700)           |                            |           |           |  |  |  |
| Bolivia                  | 598500                                         | 22.7                  | 4.9              | 8.1                        | 9.8 (6.1-12.6)   | 8.1 (5.4-11.6)   | 1.7 (0.4-1.6) | 58,800 (36700-75400)        | 48,600 (32200-69500)       | 10,100 (2500-9700)      |                            |           |           |  |  |  |
| Botswana                 | 47200                                          | 11.7                  | 13.1             | 15.1                       | 20.4 (15.3-25.5) | 18.0 (12.9-22.8) | 2.4 (0.9-4)   | 9,600 (7200-12000)          | 8,500 (6100-10800)         | 1,100 (400-1900)        |                            |           |           |  |  |  |
| Brazil                   | 3.00E+06                                       | 10.3                  | 8.4              | 9.2                        | 13.4 (9.9-17.6)  | 11.5 (8.2-15.5)  | 1.9 (1.2-3.1) | 405,400 (296500-528900)     | 347,100 (247200-466100)    | 58,300 (37100-94300)    |                            |           |           |  |  |  |
| Brunei Darussalam        | 7600                                           | 4.0                   | 11.1             | 12.1                       | 20.7 (15.6-28.2) | 18.1 (13.1-24.6) | 2.6 (1.2-6.1) | 1,600 (1200-2100)           | 1,400 (1000-1900)          | 200 (100-500)           |                            |           |           |  |  |  |
| Burkina Faso             | 713200                                         | 34.6                  | 10.6             | 10.9                       | 20.8 (17.5-24.1) | 19.1 (15.9-22.3) | 1.7 (1-2.6)   | 148,400 (124800-171600)     | 135,900 (113100-158800)    | 12,500 (6900-18700)     |                            |           |           |  |  |  |
| Burundi                  | 283000                                         | 43.6                  | 11.2             | 11.4                       | 23.6 (20.1-27.6) | 21.8 (18.4-25.2) | 1.8 (0.7-3.9) | 66,800 (57000-78100)        | 61,600 (52000-71400)       | 5,200 (2000-11100)      |                            |           |           |  |  |  |
| Cambodia                 | 318200                                         | 20.6                  | 8.0              | 10.5                       | 18.7 (13.8-25.3) | 16.4 (11.6-22.5) | 2.4 (1-5.2)   | 59,600 (43900-80600)        | 52,100 (36900-71700)       | 7,500 (3100-16500)      |                            |           |           |  |  |  |
| Cameroon                 | 709900                                         | 33.5                  | 10.8             | 12.6                       | 21.2 (17.6-24.8) | 19.1 (15.9-22.4) | 2.0 (1-3.7)   | 150,200 (125100-175800)     | 135,900 (113000-158900)    | 14,300 (7200-26000)     |                            |           |           |  |  |  |
| Cape Verde               | 10300                                          | 10.2                  | 6.0              | 11.2                       | 10.8 (7.6-14.6)  | 9.0 (6.2-12.5)   | 1.9 (0.7-3)   | 1,100 (800-1500)            | 900 (600-1300)             | 200 (100-300)           |                            |           |           |  |  |  |
| Central African Republic | 154200                                         | 46.2                  | 13.0             | 12.6                       | 27.0 (22.9-31.5) | 25.0 (21.1-28.7) | 2.0 (0.8-4.6) | 41,700 (35300-48500)        | 38,500 (32600-44300)       | 3,100 (1300-7000)       |                            |           |           |  |  |  |
| Chad                     | 503200                                         | 42.6                  | 21.7             | 13.1                       | 36.8 (31.6-42.5) | 34.7 (29.5-39.8) | 2.1 (0.8-4.5) | 185,100 (159100-213900)     | 174,600 (148700-200000)    | 10,600 (3900-22800)     |                            |           |           |  |  |  |
| Chile                    | 245500                                         | 4.7                   | 6.1              | 7.1                        | 9.6 (6.8-13.2)   | 8.1 (5.3-11.7)   | 1.5 (1.3-1.7) | 23,500 (16600-32400)        | 19,800 (13000-28800)       | 3,700 (3200-4200)       |                            |           |           |  |  |  |
| China                    | 1.70E+07                                       | 9.4                   | 2.4              | 7.1                        | 6.5 (3.8-10.7)   | 4.9 (2.3-9.2)    | 1.6 (1.1-2)   | 1,072,100 (648300-1817600)  | 810,700 (570100-1157000)   | 261,400 (184000-332300) |                            |           |           |  |  |  |
| Colombia                 | 913900                                         | 11.6                  | 9.0              | 8.8                        | 14.2 (10.7-18.3) | 12.4 (9-16.4)    | 1.8 (1.3-2.2) | 129,900 (98100-167300)      | 113,100 (81800-150300)     | 16,900 (12100-20300)    |                            |           |           |  |  |  |
| Comoros                  | 27600                                          | 32.1                  | 25.0             | 16.7                       | 37.6 (30.8-43.8) | 34.9 (28.8-40.5) | 2.7 (1.1-5)   | 10,400 (8500-12100)         | 9,600 (8000-11200)         | 700 (300-1400)          |                            |           |           |  |  |  |
| Congo                    | 142500                                         | 31.9                  | 13.1             | 16.7                       | 24.6 (20.5-28.2) | 22.0 (18.2-25.4) | 2.7 (1.1-4.2) | 35,100 (29200-40100)        | 31,300 (25900-36200)       | 3,800 (1600-5900)       |                            |           |           |  |  |  |
| Costa Rica               | 73300                                          | 6.1                   | 6.3              | 13.6                       | 11.3 (7.7-15.3)  | 8.5 (5.6-12.1)   | 2.8 (1.2-5.1) | 8,300 (5700-11200)          | 6,200 (4100-8900)          | 2,100 (900-3700)        |                            |           |           |  |  |  |
| Cote d'Ivoire            | 673100                                         | 41.5                  | 16.7             | 14.0                       | 31.0 (26.7-35.4) | 28.8 (24.6-32.7) | 2.3 (0.9-4.7) | 208,700 (180000-238100)     | 193,500 (165700-219800)    | 15,200 (6100-31700)     |                            |           |           |  |  |  |
| Cuba                     | 111600                                         | 2.8                   | 5.4              | 6.4                        | 8.4 (5.7-11.9)   | 7.1 (4.5-10.5)   | 1.3 (1.1-1.7) | 9,400 (6400-13300)          | 7,900 (5000-11700)         | 1,500 (1200-1800)       |                            |           |           |  |  |  |
| Democratic PR Korea      | 347600                                         | 17.5                  | 6.7              | 10.7                       | 16.0 (11.1-22.4) | 13.6 (9.2-19.9)  | 2.4 (1-5)     | 55,700 (38500-77800)        | 47,400 (31900-69200)       | 8,300 (3500-17300)      |                            |           |           |  |  |  |
| DR Congo                 | 2.90E+06                                       | 47.4                  | 9.6              | 11.9                       | 21.9 (18-26)     | 20.0 (16.3-23.6) | 1.9 (0.8-4)   | 629,400 (523000-754900)     | 574,600 (471400-684500)    | 54,800 (23900-115900)   |                            |           |           |  |  |  |
| Djibouti                 | 25700                                          | 33.3                  | 20.0             | 11.9                       | 32.3 (27-37)     | 30.4 (25.2-34.7) | 1.9 (0.7-4)   | 8,300 (6900-9500)           | 7,800 (6500-8900)          | 500 (200-1000)          |                            |           |           |  |  |  |
| Dominica                 | 1200                                           | 8.6                   | 9.7              | 11.9                       | 14.5 (11.5-20.7) | 12.8 (9.2-17.1)  | 1.7 (1.4-5.6) | 200 (100-200)               | 200 (100-200)              | 21 (16-68)              |                            |           |           |  |  |  |
| Dominican Republic       | 216400                                         | 14.3                  | 7.7              | 10.8                       | 13.4 (9.9-18)    | 11.1 (8-14.8)    | 2.2 (1.2-4.7) | 28,900 (21400-38900)        | 24,000 (17300-32000)       | 4,900 (2600-10100)      |                            |           |           |  |  |  |
| Ecuador                  | 298900                                         | 10.5                  | 6.1              | 5.1                        | 9.7 (6.9-13.7)   | 8.6 (5.8-12.2)   | 1.1 (0.5-2.6) | 29,000 (20500-40900)        | 25,800 (17400-36400)       | 3,200 (1600-7800)       |                            |           |           |  |  |  |

| Country                          | Birth Prevalence (per 100 live births) in 2010 |                       |                  |                            |                  |                  |               |                                | Number of Live Births 2010     |                          |  |  |  |  |
|----------------------------------|------------------------------------------------|-----------------------|------------------|----------------------------|------------------|------------------|---------------|--------------------------------|--------------------------------|--------------------------|--|--|--|--|
|                                  | Live births 2010 <sup>1</sup>                  | NMR 2010 <sup>2</sup> | LBW <sup>3</sup> | Preterm Birth <sup>4</sup> | SGA (UR)         | TSGA (UR)        | PSGA (UR)     | SGA (UR)                       | TSGA (UR)                      | PSGA (UR)                |  |  |  |  |
| Egypt                            | 1.90E+06                                       | 7.8                   | 6.0              | 7.3                        | 9.9 (6.8-13.4)   | 8.7 (5.8-12.2)   | 1.2 (0.5-2)   | 186,300 (128700-254900)        | 164,300 (110800-232200)        | 22,000 (10000-37100)     |  |  |  |  |
| El Salvador                      | 125800                                         | 6.7                   | 9.8              | 12.8                       | 15.3 (11.2-20.8) | 12.6 (9-16.9)    | 2.7 (1.1-6.3) | 19,300 (14100-26200)           | 15,900 (11300-21300)           | 3,400 (1400-8000)        |  |  |  |  |
| Equatorial Guinea                | 25800                                          | 38.0                  | 12.8             | 16.5                       | 25.5 (21.5-29.6) | 22.9 (19.3-26.2) | 2.6 (1.1-5.1) | 6,600 (5500-7600)              | 5,900 (5000-6800)              | 700 (300-1300)           |  |  |  |  |
| Eritrea                          | 190600                                         | 21.9                  | 14.1             | 12.2                       | 23.1 (18.2-27.5) | 21.1 (16.4-25.3) | 2.0 (0.9-4)   | 43,900 (34700-52500)           | 40,200 (31300-48100)           | 3,700 (1600-7600)        |  |  |  |  |
| Ethiopia                         | 2.60E+06                                       | 32.4                  | 20.3             | 10.1                       | 32.1 (26.9-36.8) | 30.5 (25.4-35.1) | 1.6 (0.9-2.3) | 838,000 (698900-957600)        | 795,700 (660400-912400)        | 42,300 (24300-60200)     |  |  |  |  |
| Fiji                             | 18500                                          | 7.9                   | 9.0              | 9.9                        | 18.0 (13-24.5)   | 15.8 (11.1-22)   | 2.2 (0.9-4.3) | 3,300 (2400-4500)              | 2,900 (2100-4100)              | 400 (200-800)            |  |  |  |  |
| Gabon                            | 40900                                          | 24.8                  | 14.3             | 16.3                       | 24.6 (19.7-28.7) | 21.9 (17.5-25.8) | 2.6 (1.1-4.9) | 10,000 (8100-11800)            | 9,000 (7100-10600)             | 1,100 (500-2000)         |  |  |  |  |
| Gambia                           | 65900                                          | 34.5                  | 19.9             | 14.0                       | 32.8 (27.5-37.8) | 30.6 (25.5-34.9) | 2.2 (0.9-4.9) | 21,600 (18100-24900)           | 20,200 (16800-23000)           | 1,500 (600-3200)         |  |  |  |  |
| Georgia                          | 51800                                          | 15.1                  | 6.8              | 8.8                        | 15.4 (10.7-21.6) | 13.5 (9-19.7)    | 2.0 (1.1-2.9) | 8,000 (5600-11200)             | 7,000 (4700-10200)             | 1,000 (600-1500)         |  |  |  |  |
| Ghana                            | 769700                                         | 29.9                  | 13.4             | 14.5                       | 24.2 (20.1-28.3) | 21.9 (18.1-25.4) | 2.3 (0.9-4.9) | 186,600 (154700-217900)        | 168,700 (139000-195900)        | 17,900 (6900-37600)      |  |  |  |  |
| Grenada                          | 2000                                           | 6.7                   | 7.5              | 10.3                       | 12.1 (8.8-16.5)  | 10.0 (6.9-13.8)  | 2.1 (1.2-4.6) | 200 (200-300)                  | 200 (100-300)                  | 42 (23-92)               |  |  |  |  |
| Guatemala                        | 466600                                         | 15.0                  | 8.3              | 7.7                        | 13.6 (10.4-17.4) | 12.0 (8.7-15.9)  | 1.6 (1-2.7)   | 63,300 (48600-81300)           | 55,800 (40700-74200)           | 7,500 (4800-12500)       |  |  |  |  |
| Guinea                           | 389900                                         | 39.9                  | 12.2             | 13.9                       | 24.7 (21-28.7)   | 22.4 (19.1-25.7) | 2.2 (0.9-4.8) | 96,200 (81900-112000)          | 87,500 (74400-100100)          | 8,700 (3400-18600)       |  |  |  |  |
| Guinea-Bissau                    | 58200                                          | 43.9                  | 23.9             | 11.2                       | 39.1 (33.5-45)   | 37.3 (31.8-42.9) | 1.8 (0.7-3.7) | 22,700 (19500-26200)           | 21,700 (18500-25000)           | 1,000 (400-2100)         |  |  |  |  |
| Guyana                           | 13600                                          | 20.1                  | 11.2             | 13.2                       | 19.1 (15.1-24.2) | 16.3 (12.4-20.5) | 2.8 (1.6-6)   | 2,600 (2100-3300)              | 2,200 (1700-2800)              | 400 (200-800)            |  |  |  |  |
| Haiti                            | 266500                                         | 27.3                  | 24.6             | 14.1                       | 34.8 (28.2-42.3) | 31.9 (25.1-38.5) | 2.9 (1.7-6.3) | 92,700 (75100-112600)          | 84,900 (66800-102700)          | 7,800 (4400-16800)       |  |  |  |  |
| Honduras                         | 203400                                         | 11.0                  | 10.2             | 12.2                       | 16.2 (12.3-21.6) | 13.7 (10-18)     | 2.5 (1.4-5.7) | 33,000 (25100-43900)           | 27,900 (20300-36600)           | 5,200 (2800-11500)       |  |  |  |  |
| India                            | 2.70E+07                                       | 33.1                  | 27.6             | 13.0                       | 46.9 (42.6-53)   | 44.0 (40-50)     | 2.9 (2-3.8)   | 12,800,000 (11500000-14300000) | 12,000,000 (10800000-13500000) | 784,600 (543500-1019300) |  |  |  |  |
| Indonesia                        | 4.40E+06                                       | 15.9                  | 11.1             | 15.5                       | 23.8 (18.5-29.8) | 20.4 (15.4-26.3) | 3.4 (1.9-4.8) | 1,042,300 (814800-1309300)     | 891,600 (677600-1158300)       | 150,700 (85200-211300)   |  |  |  |  |
| Iran (Islamic Republic of)       | 1.30E+06                                       | 14.3                  | 7.2              | 12.9                       | 16.9 (12-22.3)   | 14.0 (9.3-19.7)  | 2.9 (1.8-4)   | 214,200 (156500-290200)        | 177,600 (120600-256000)        | 36,500 (23600-52000)     |  |  |  |  |
| Iraq                             | 1.10E+06                                       | 20.2                  | 5.6              | 6.5                        | 13.5 (9.3-20.3)  | 12.0 (7.9-18.6)  | 1.5 (0.7-3.3) | 151,700 (102000-223000)        | 135,300 (86900-204800)         | 16,400 (7500-36200)      |  |  |  |  |
| Jamaica                          | 50600                                          | 11.8                  | 12.1             | 10.2                       | 18.1 (14-23.4)   | 16.0 (11.7-20.4) | 2.1 (1.4-4.9) | 9,200 (7100-11800)             | 8,100 (5900-10300)             | 1,100 (700-2500)         |  |  |  |  |
| Jordan                           | 153500                                         | 12.3                  | 8.4              | 14.4                       | 18.9 (13.4-25.2) | 15.7 (11-21.8)   | 3.2 (1.1-5)   | 29,000 (20600-38700)           | 24,000 (16800-33500)           | 4,900 (1700-7600)        |  |  |  |  |
| Kazakhstan                       | 344100                                         | 14.7                  | 7.5              | 8.8                        | 16.6 (11.8-22.8) | 14.6 (10-20.8)   | 2.0 (1.2-2.6) | 57,000 (40500-78300)           | 50,200 (34500-71500)           | 6,800 (4200-8900)        |  |  |  |  |
| Kenya                            | 1.50E+06                                       | 27.2                  | 7.7              | 12.3                       | 15.5 (12.7-19.5) | 13.5 (10.8-17.3) | 2.0 (1.1-2.9) | 236,800 (190100-292600)        | 206,600 (161700-259300)        | 30,200 (17100-43100)     |  |  |  |  |
| Kiribati                         | 2000                                           | 19.4                  | 8.2              | 9.6                        | 18.7 (13.7-25.3) | 16.5 (11.7-22.7) | 2.2 (0.9-4.5) | 400 (300-500)                  | 300 (200-500)                  | 45 (19-91)               |  |  |  |  |
| Kuwait                           | 49200                                          | 5.4                   | 7.6              | 10.6                       | 15.7 (11-22.3)   | 13.4 (8.9-19.5)  | 2.4 (0.9-4.9) | 7,700 (5400-11000)             | 6,600 (4400-9600)              | 1,200 (500-2400)         |  |  |  |  |
| Kyrgyzstan                       | 129800                                         | 16.2                  | 6.2              | 10.4                       | 14.9 (10-21.5)   | 12.6 (8.3-18.8)  | 2.3 (1-4.8)   | 19,300 (13000-27900)           | 16,300 (10700-24400)           | 3,000 (1300-6200)        |  |  |  |  |
| Lao People's Democratic Republic | 141100                                         | 18.1                  | 10.8             | 10.8                       | 22.8 (17.5-29.5) | 20.4 (15.5-26.5) | 2.4 (1.1-5.5) | 32,200 (24700-41600)           | 28,800 (21900-37300)           | 3,400 (1500-7800)        |  |  |  |  |
| Lebanon                          | 65000                                          | 5.6                   | 6.0              | 7.9                        | 12.6 (8.4-18.6)  | 10.9 (6.8-16.8)  | 1.7 (1.1-2.3) | 8,200 (5500-12100)             | 7,100 (4400-10900)             | 1,100 (700-1500)         |  |  |  |  |
| Lesotho                          | 60400                                          | 39.0                  | 10.5             | 11.9                       | 21.7 (18.2-25.5) | 19.8 (16.5-23)   | 1.9 (0.7-4)   | 13,100 (11000-15400)           | 11,900 (10000-13900)           | 1,200 (400-2400)         |  |  |  |  |
| Liberia                          | 153700                                         | 28.4                  | 13.7             | 13.9                       | 24.2 (19.9-28.6) | 22.0 (18-25.6)   | 2.2 (0.9-4.8) | 37,200 (30500-44000)           | 33,800 (27600-39300)           | 3,400 (1400-7400)        |  |  |  |  |
| Libyan Arab Jamahiriya           | 145000                                         | 10.1                  | 4.0              | 8.3                        | 7.5 (5-11.2)     | 6.2 (3.9-9.3)    | 1.3 (0.5-2.8) | 10,900 (7200-16200)            | 8,900 (5600-13400)             | 1,900 (800-4100)         |  |  |  |  |
| Madagascar                       | 731900                                         | 23.7                  | 15.6             | 14.2                       | 25.5 (20.2-30)   | 23.2 (18.4-27.3) | 2.3 (0.9-4.7) | 186,600 (147500-219600)        | 169,900 (134700-200100)        | 16,700 (6800-34700)      |  |  |  |  |
| Malawi                           | 662700                                         | 27.8                  | 12.5             | 18.1                       | 23.2 (19.1-27)   | 20.3 (16.5-24)   | 2.9 (1.7-4.3) | 153,900 (126500-178800)        | 134,700 (109400-158800)        | 19,200 (11400-28200)     |  |  |  |  |
| Malaysia                         | 576400                                         | 3.6                   | 11.1             | 12.3                       | 20.8 (15.3-27.9) | 18.0 (13-24.5)   | 2.7 (1.2-5.7) | 119,700 (88100-161000)         | 103,900 (75000-141400)         | 15,800 (6700-33000)      |  |  |  |  |
| Maldives                         | 5300                                           | 7.4                   | 9.9              | 7.9                        | 18.7 (13.9-25)   | 17.1 (12.3-23.3) | 1.7 (1-2.4)   | 1,000 (700-1300)               | 900 (700-1200)                 | 89 (55-129)              |  |  |  |  |
| Mali                             | 714100                                         | 49.7                  | 18.7             | 11.6                       | 35.2 (30.2-40.9) | 33.3 (28.5-38.5) | 1.9 (0.8-4.1) | 251,400 (215300-292000)        | 238,100 (203800-275100)        | 13,300 (5400-29500)      |  |  |  |  |
| Marshall Islands                 | 1100                                           | 12.2                  | 15.4             | 11.5                       | 27.4 (22.3-34.2) | 25.3 (20.2-31.4) | 2.0 (1-5.4)   | 300 (200-400)                  | 300 (200-300)                  | 22 (11-60)               |  |  |  |  |
| Mauritania                       | 116800                                         | 40.5                  | 33.7             | 15.4                       | 47.0 (39.1-54.9) | 44.5 (37.2-52.2) | 2.5 (1-4.8)   | 54,900 (45700-64100)           | 52,000 (43400-60900)           | 2,900 (1100-5600)        |  |  |  |  |
| Mauritius                        | 16600                                          | 9.4                   | 13.9             | 12.6                       | 20.4 (14.7-25.9) | 18.4 (12.9-23.6) | 2.0 (0.8-4.2) | 3,400 (2400-4300)              | 3,100 (2100-3900)              | 300 (100-700)            |  |  |  |  |

| Country                          | Birth Prevalence (per 100 live births) in 2010 |                       |                  |                            |                  |                  |               |                             |                             |                         | Number of Live Births 2010 |           |           |  |  |  |
|----------------------------------|------------------------------------------------|-----------------------|------------------|----------------------------|------------------|------------------|---------------|-----------------------------|-----------------------------|-------------------------|----------------------------|-----------|-----------|--|--|--|
|                                  | Live births 2010 <sup>1</sup>                  | NMR 2010 <sup>2</sup> | LBW <sup>3</sup> | Preterm Birth <sup>4</sup> | SGA (UR)         | TSGA (UR)        | PSGA (UR)     | SGA (UR)                    | TSGA (UR)                   | PSGA (UR)               | SGA (UR)                   | TSGA (UR) | PSGA (UR) |  |  |  |
| Mexico                           | 2.20E+06                                       | 7.4                   | 6.1              | 7.3                        | 9.9 (7.1-13.5)   | 8.3 (5.6-12.1)   | 1.5 (1.3-1.8) | 218,800 (155100-297500)     | 184,800 (122900-265400)     | 33,900 (29300-39600)    |                            |           |           |  |  |  |
| Micronesia (Federated States of) | 2700                                           | 17.5                  | 11.1             | 10.5                       | 23.2 (17.9-29.7) | 20.7 (15.8-26.7) | 2.5 (1.4-9)   | 600 (500-800)               | 600 (400-700)               | 100 (0-100)             |                            |           |           |  |  |  |
| Mongolia                         | 64700                                          | 12.4                  | 3.8              | 13.5                       | 10.8 (7.1-16.1)  | 7.8 (4.4-13.2)   | 3.0 (1.4-4.8) | 7,000 (4600-10400)          | 5,000 (2800-8600)           | 1,900 (900-3100)        |                            |           |           |  |  |  |
| Morocco                          | 623400                                         | 19.3                  | 3.8              | 6.7                        | 7.6 (5.2-11.1)   | 6.5 (4.2-9.7)    | 1.1 (0.4-2.5) | 47,500 (32600-69100)        | 40,800 (26400-60400)        | 6,700 (2500-15400)      |                            |           |           |  |  |  |
| Mozambique                       | 882800                                         | 34.6                  | 15.2             | 16.4                       | 27.9 (23.6-31.7) | 25.2 (21.2-28.6) | 2.6 (1.1-4.2) | 245,900 (207900-279600)     | 222,700 (187200-252500)     | 23,300 (9900-37000)     |                            |           |           |  |  |  |
| Myanmar                          | 830100                                         | 30.5                  | 15.0             | 12.4                       | 32.1 (27-38.3)   | 29.3 (24.5-35.1) | 2.8 (1.1-5.6) | 266,200 (224200-317700)     | 243,300 (203500-291400)     | 22,900 (9400-46100)     |                            |           |           |  |  |  |
| Namibia                          | 60000                                          | 18.7                  | 15.7             | 14.4                       | 24.6 (18.9-29.4) | 22.2 (16.8-26.8) | 2.3 (0.9-4.6) | 14,700 (11400-17700)        | 13,300 (10100-16100)        | 1,400 (500-2800)        |                            |           |           |  |  |  |
| Nepal                            | 723500                                         | 27.9                  | 21.2             | 14.0                       | 39.3 (34.7-44.4) | 36.2 (31.9-41.3) | 3.1 (1.9-4.3) | 284,400 (251200-321200)     | 261,700 (230900-298900)     | 22,600 (13500-31300)    |                            |           |           |  |  |  |
| Nicaragua                        | 138400                                         | 13.0                  | 9.0              | 9.3                        | 14.5 (10.8-19.5) | 12.6 (9.1-16.6)  | 1.9 (1.1-4.8) | 20,100 (14900-27000)        | 17,400 (12600-23000)        | 2,700 (1500-6700)       |                            |           |           |  |  |  |
| Niger                            | 754900                                         | 32.7                  | 26.7             | 9.4                        | 38.1 (31.2-44.9) | 36.6 (30-42.6)   | 1.5 (0.8-4.1) | 287,800 (235300-338600)     | 276,400 (226800-321500)     | 11,400 (5700-30600)     |                            |           |           |  |  |  |
| Nigeria                          | 6.30E+06                                       | 40.2                  | 11.7             | 12.2                       | 23.7 (20.2-27.1) | 21.8 (18.5-25.1) | 2.0 (1.2-2.8) | 1,503,800 (1275300-1709100) | 1,379,500 (1167400-1583100) | 124,200 (76700-177100)  |                            |           |           |  |  |  |
| Oman                             | 49600                                          | 5.5                   | 9.9              | 14.3                       | 19.9 (14.7-26.3) | 16.7 (11.9-22.9) | 3.2 (1.7-4.8) | 9,900 (7300-13100)          | 8,300 (5900-11400)          | 1,600 (800-2400)        |                            |           |           |  |  |  |
| Pakistan                         | 4.70E+06                                       | 36.1                  | 26.0             | 15.8                       | 47.0 (42.8-53.8) | 43.5 (39.4-49.9) | 3.5 (2.2-5)   | 2,228,100 (2012200-2529800) | 2,061,300 (1854100-2345000) | 166,800 (102300-234100) |                            |           |           |  |  |  |
| Panama                           | 70000                                          | 9.1                   | 8.5              | 8.1                        | 13.2 (9.7-17.4)  | 11.5 (8.1-15.5)  | 1.7 (1.1-2.9) | 9,200 (6800-12200)          | 8,000 (5700-10900)          | 1,200 (800-2000)        |                            |           |           |  |  |  |
| Papua New Guinea                 | 207200                                         | 23.0                  | 10.0             | 6.5                        | 21.6 (16.6-28.2) | 20.1 (15.2-26.1) | 1.5 (0.7-3.7) | 44,800 (34500-58400)        | 41,700 (31500-54100)        | 3,000 (1500-7700)       |                            |           |           |  |  |  |
| Paraguay                         | 156400                                         | 13.2                  | 6.3              | 7.8                        | 10.8 (7.7-14.9)  | 9.2 (6.3-12.8)   | 1.6 (0.9-4.4) | 16,900 (12000-23400)        | 14,300 (9900-19900)         | 2,500 (1400-6900)       |                            |           |           |  |  |  |
| Peru                             | 593900                                         | 9.8                   | 7.1              | 7.3                        | 11.4 (8.1-15.1)  | 9.8 (6.9-13.5)   | 1.5 (0.9-2.4) | 67,500 (48200-89900)        | 58,400 (40800-80400)        | 9,100 (5500-14500)      |                            |           |           |  |  |  |
| Philippines                      | 2.30E+06                                       | 12.6                  | 19.6             | 14.9                       | 33.6 (27.9-40.8) | 30.2 (25.5-36.7) | 3.3 (1.4-6.8) | 786,700 (641600-937900)     | 708,900 (586500-843900)     | 77,800 (32100-155700)   |                            |           |           |  |  |  |
| Qatar                            | 20700                                          | 4.2                   | 7.1              | 10.5                       | 14.8 (10.1-21.2) | 12.4 (8-18.5)    | 2.4 (0.9-4.9) | 3,100 (2100-4400)           | 2,600 (1700-3800)           | 500 (200-1000)          |                            |           |           |  |  |  |
| Republic of Korea                | 478100                                         | 2.1                   | 4.4              | 9.2                        | 10.0 (6.2-15.4)  | 7.9 (4.4-13.4)   | 2.0 (1.1-3.9) | 47,600 (29700-73700)        | 37,800 (21100-63900)        | 9,800 (5100-18700)      |                            |           |           |  |  |  |
| Rwanda                           | 437500                                         | 22.8                  | 6.3              | 9.5                        | 12.3 (9.4-16.4)  | 10.8 (8.1-14.2)  | 1.5 (0.6-3.6) | 53,900 (41200-71700)        | 47,300 (35300-61900)        | 6,700 (2800-15800)      |                            |           |           |  |  |  |
| Saint Lucia                      | 3100                                           | 9.5                   | 10.1             | 11.1                       | 15.4 (11.7-20.5) | 13.4 (9.7-17.7)  | 2.0 (1.2-4.5) | 500 (400-600)               | 400 (300-500)               | 100 (0-100)             |                            |           |           |  |  |  |
| Saint Vincent and the Grenadines | 1900                                           | 13.3                  | 7.9              | 11.8                       | 13.4 (10.3-18.2) | 11.2 (8.1-15)    | 2.2 (1.3-5.2) | 300 (200-300)               | 200 (200-300)               | 42 (26-98)              |                            |           |           |  |  |  |
| Samoa                            | 4500                                           | 7.8                   | 1.2              | 5.5                        | 3.5 (1.9-7.1)    | 2.5 (1-5.7)      | 1.0 (0.5-2.8) | 200 (100-300)               | 100 (0-300)                 | 45 (23-128)             |                            |           |           |  |  |  |
| Sao Tome and Principe            | 5200                                           | 29.4                  | 7.8              | 10.5                       | 15.5 (12.5-19.4) | 14.0 (11-17.4)   | 1.5 (0.7-3.5) | 800 (700-1000)              | 700 (600-900)               | 100 (0-200)             |                            |           |           |  |  |  |
| Saudi Arabia                     | 594600                                         | 5.8                   | 7.5              | 6.0                        | 14.6 (10-20.6)   | 13.3 (8.8-19.4)  | 1.3 (0.8-1.8) | 86,800 (59200-122600)       | 78,900 (52300-115100)       | 8,000 (4900-10700)      |                            |           |           |  |  |  |
| Senegal                          | 465400                                         | 26.9                  | 18.8             | 9.7                        | 29.0 (23.5-34)   | 27.5 (22.2-31.9) | 1.6 (0.7-3.9) | 135,200 (109200-158200)     | 127,900 (103400-148600)     | 7,300 (3100-18300)      |                            |           |           |  |  |  |
| Seychelles                       | 1100                                           | 8.7                   | 10.0             | 11.6                       | 15.3 (11.4-20.4) | 13.9 (9.7-18.2)  | 1.5 (0.8-4)   | 200 (100-200)               | 200 (100-200)               | 16 (9-44)               |                            |           |           |  |  |  |
| Sierra Leone                     | 226400                                         | 49.9                  | 13.6             | 10.0                       | 28.4 (24.2-32.7) | 26.7 (22.7-30.8) | 1.6 (0.6-3.3) | 64,200 (54700-74100)        | 60,500 (51500-69800)        | 3,600 (1400-7600)       |                            |           |           |  |  |  |
| Singapore                        | 45400                                          | 1.2                   | 9.3              | 11.5                       | 17.7 (12.4-24.4) | 15.2 (10.4-21.5) | 2.6 (1.1-5.4) | 8,100 (5600-11100)          | 6,900 (4700-9800)           | 1,200 (500-2400)        |                            |           |           |  |  |  |
| Solomon Islands                  | 17200                                          | 10.7                  | 12.5             | 12.4                       | 24.0 (18.9-30.3) | 21.3 (16.3-27.3) | 2.7 (1.2-6)   | 4,100 (3300-5200)           | 3,700 (2800-4700)           | 500 (200-1000)          |                            |           |           |  |  |  |
| Somalia                          | 407700                                         | 50.1                  | 11.2             | 12.0                       | 25.1 (20.8-29.3) | 23.2 (19.2-27.1) | 1.9 (0.8-3.8) | 102,300 (84800-119300)      | 94,500 (78200-110400)       | 7,800 (3200-15600)      |                            |           |           |  |  |  |
| South Africa                     | 1.10E+06                                       | 19.6                  | 15.1             | 8.0                        | 23.0 (17.1-26.6) | 21.8 (16-25.2)   | 1.3 (0.7-2.7) | 244,100 (187600-292800)     | 230,500 (176500-277100)     | 13,600 (7400-29600)     |                            |           |           |  |  |  |
| Sri Lanka                        | 378400                                         | 7.9                   | 13.4             | 10.7                       | 24.3 (18.7-30.8) | 21.9 (16.7-28.1) | 2.4 (1.4-4.2) | 91,800 (70900-116400)       | 82,700 (63100-106500)       | 9,100 (5400-15900)      |                            |           |           |  |  |  |
| Sudan                            | 1.40E+06                                       | 31.5                  | 30.7             | 13.2                       | 41.7 (34.7-49.8) | 39.5 (32.8-47.4) | 2.1 (1.2-3.4) | 595,200 (485900-696600)     | 565,000 (459300-663900)     | 30,200 (16200-47400)    |                            |           |           |  |  |  |
| Suriname                         | 9700                                           | 16.3                  | 10.9             | 8.8                        | 17.3 (13.2-21.8) | 15.3 (11.5-19.6) | 1.9 (1.2-3.3) | 1,700 (1300-2100)           | 1,500 (1100-1900)           | 200 (100-300)           |                            |           |           |  |  |  |
| Swaziland                        | 34800                                          | 34.5                  | 9.2              | 13.9                       | 19.2 (15.9-23)   | 17.0 (13.9-20.4) | 2.2 (1-4.6)   | 6,700 (5500-8000)           | 5,900 (4800-7100)           | 800 (300-1600)          |                            |           |           |  |  |  |
| Syrian Arab Republic             | 465100                                         | 9.0                   | 9.4              | 10.9                       | 19.0 (13.9-25.5) | 16.6 (11.9-22.8) | 2.4 (1-5.3)   | 88,500 (64900-118400)       | 77,300 (55100-106200)       | 11,300 (4700-24700)     |                            |           |           |  |  |  |
| Tajikistan                       | 192000                                         | 25.4                  | 6.6              | 10.7                       | 17.0 (12.1-23.9) | 14.7 (10-21)     | 2.4 (1-4.8)   | 32,700 (23200-45800)        | 28,100 (19200-40400)        | 4,600 (1900-9200)       |                            |           |           |  |  |  |

| Country                     | Birth Prevalence (per 100 live births) in 2010 |                       |                  |                            |                  |                  |               |                         | Number of Live Births 2010 |                      |  |  |  |  |
|-----------------------------|------------------------------------------------|-----------------------|------------------|----------------------------|------------------|------------------|---------------|-------------------------|----------------------------|----------------------|--|--|--|--|
|                             | Live births 2010 <sup>1</sup>                  | NMR 2010 <sup>2</sup> | LBW <sup>3</sup> | Preterm Birth <sup>4</sup> | SGA (UR)         | TSGA (UR)        | PSGA (UR)     | SGA (UR)                | TSGA (UR)                  | PSGA (UR)            |  |  |  |  |
| Thailand                    | 838300                                         | 7.9                   | 9.2              | 12.0                       | 18.8 (13.7-25.2) | 16.1 (11.4-22.3) | 2.7 (1.8-3.7) | 157,700 (114900-210900) | 135,300 (95900-186900)     | 22,500 (15200-31000) |  |  |  |  |
| Timor-Leste                 | 43700                                          | 24.8                  | 12.0             | 12.1                       | 26.3 (21.2-32.8) | 23.6 (18.7-29.6) | 2.7 (1.2-5.9) | 11,500 (9300-14300)     | 10,300 (8200-12900)        | 1,200 (500-2600)     |  |  |  |  |
| Togo                        | 193400                                         | 36.1                  | 11.5             | 13.3                       | 22.8 (19.2-26.5) | 20.6 (17.3-23.9) | 2.1 (0.9-4.6) | 44,100 (37200-51300)    | 39,900 (33400-46200)       | 4,100 (1700-8800)    |  |  |  |  |
| Tonga                       | 2800                                           | 8.0                   | 3.0              | 7.5                        | 7.5 (4.4-12.6)   | 5.9 (3-10.9)     | 1.6 (0.7-3.4) | 200 (100-400)           | 200 (100-300)              | 45 (19-97)           |  |  |  |  |
| Trinidad and Tobago         | 19800                                          | 18.6                  | 10.2             | 8.1                        | 16.5 (12.9-20.7) | 14.9 (11.1-19)   | 1.7 (1.1-3)   | 3,300 (2600-4100)       | 2,900 (2200-3800)          | 300 (200-600)        |  |  |  |  |
| Tunisia                     | 179500                                         | 10.0                  | 5.4              | 8.9                        | 9.6 (6.6-13.2)   | 8.1 (5.4-11.7)   | 1.4 (0.7-2.6) | 17,200 (11800-23800)    | 14,600 (9700-20900)        | 2,600 (1300-4700)    |  |  |  |  |
| Turkey                      | 1.30E+06                                       | 9.5                   | 11.0             | 12.0                       | 21.7 (16.4-28.1) | 19.0 (14.1-25.1) | 2.7 (1.6-4.1) | 281,300 (213000-364800) | 246,600 (182700-326300)    | 34,600 (21400-53400) |  |  |  |  |
| Turkmenistan                | 109000                                         | 22.0                  | 5.1              | 9.8                        | 13.5 (8.9-19.9)  | 11.3 (7-17.4)    | 2.2 (0.9-4.6) | 14,700 (9700-21600)     | 12,300 (7700-18900)        | 2,400 (1000-5000)    |  |  |  |  |
| Uganda                      | 1.50E+06                                       | 28.3                  | 14.0             | 13.6                       | 24.5 (20.3-28.7) | 22.3 (18.4-26.2) | 2.2 (1.2-4.2) | 370,900 (304800-430100) | 337,900 (276000-393600)    | 33,000 (17500-62600) |  |  |  |  |
| United Arab Emirates        | 91500                                          | 4.2                   | 3.2              | 7.6                        | 7.7 (4.5-12.6)   | 6.0 (3.1-11)     | 1.7 (1-2.4)   | 7,100 (4100-11600)      | 5,500 (2900-10100)         | 1,500 (900-2200)     |  |  |  |  |
| United Republic of Tanzania | 1.90E+06                                       | 26.0                  | 9.5              | 11.4                       | 17.8 (14.1-21.3) | 15.9 (12.5-19)   | 1.8 (0.7-3.8) | 331,200 (267300-405400) | 297,000 (237700-361600)    | 34,200 (14100-73000) |  |  |  |  |
| Uruguay                     | 49800                                          | 5.7                   | 9.3              | 10.1                       | 14.0 (10.5-18.3) | 11.9 (8.4-16.1)  | 2.1 (1.9-2.4) | 7,000 (5200-9100)       | 5,900 (4200-8000)          | 1,000 (900-1200)     |  |  |  |  |
| Uzbekistan                  | 587100                                         | 15.2                  | 5.0              | 8.7                        | 12.2 (8-18.2)    | 10.3 (6.3-16.2)  | 1.9 (1-3.7)   | 71,800 (47000-107000)   | 60,400 (37100-95300)       | 11,400 (6100-21700)  |  |  |  |  |
| Vanuatu                     | 7100                                           | 7.0                   | 10.2             | 12.9                       | 20.2 (14.8-27)   | 17.4 (12.5-23.6) | 2.8 (1.2-6.2) | 1,400 (1000-1900)       | 1,200 (900-1700)           | 200 (100-400)        |  |  |  |  |
| Venezuela                   | 263100                                         | 8.7                   | 8.2              | 9.0                        | 12.9 (11.3-19.7) | 11.0 (7.8-15)    | 1.9 (2.6-6.5) | 34,000 (29800-51800)    | 29,100 (20500-39400)       | 4,900 (6800-17000)   |  |  |  |  |
| Viet Nam                    | 1.50E+06                                       | 12.3                  | 5.3              | 9.4                        | 12.6 (8.2-18)    | 10.5 (6.4-16)    | 2.1 (0.8-4.2) | 184,800 (122500-270700) | 153,900 (95600-240700)     | 30,800 (12400-63600) |  |  |  |  |
| Yemen                       | 919400                                         | 32.4                  | 23.0             | 13.2                       | 42.3 (37.6-48.3) | 39.4 (35.1-44.8) | 2.9 (1.1-6.1) | 389,200 (345900-444200) | 362,200 (322900-412300)    | 27,000 (10300-56300) |  |  |  |  |
| Zambia                      | 599600                                         | 28.2                  | 11.0             | 12.9                       | 20.5 (16.9-24.6) | 18.4 (15-21.9)   | 2.1 (0.8-4.5) | 122,900 (101500-147700) | 110,400 (89700-131500)     | 12,500 (5100-26900)  |  |  |  |  |
| Zimbabwe                    | 373900                                         | 30.0                  | 11.4             | 16.6                       | 22.0 (18.3-25.4) | 19.3 (15.8-22.8) | 2.7 (1.7-3.7) | 82,100 (68500-95100)    | 72,200 (59200-85400)       | 9,900 (6200-14000)   |  |  |  |  |

## ABBREVIATIONS

NMR = Neonatal mortality rate (per 1000 live births)

LBW = Low birthweight (<2500g)

SGA = Small for gestational age (<10% gender specific birth weight for gestational age completed in weeks compared to US 1991 reference population- Alexander et al, Obstet Gynecol 1996; 87(2): 163-8)

TSGA = Term (gestational age ≥37 weeks) and Small for Gestational Age

PSGA = Preterm (gestational age <37 weeks) and Small for Gestational Age

UR = Uncertainty Range

## DATA SOURCES

1: Live births: SOWC 2011; <http://www.unicef.org/sowc2011/statistics.php>

2: UN IGME: <http://www.childmortality.org/> (9/2012 update)

3: Data Sources and Methods referenced in web-appendix 8

4: Born too Soon Report: Howson, C.P.; Kinney, M.V.; Lawn, J.E. (Editors). Born too soon: the global action report on preterm birth. World Health Organization, Geneva, Switzerland (2012) 126 pp. ISBN 978 92 4 150343 3 and Blencowe H, Cousens S, Oestergaard MZ, et al. National, regional, and worldwide estimates of preterm birth rates in the year 2010 with time trends since 1990 for selected countries: a systematic analysis and implications. Lancet 2012; 379(9832): 2162-72



## Web Appendix References

1. Christian P, Klemm R, Shamim AA, et al. Effects of vitamin A and beta-carotene supplementation on birth size and length of gestation in rural Bangladesh: a cluster-randomized trial. *The American Journal of Clinical Nutrition* 2013;97:188-94.
2. Baqui AH, El-Arifeen S, Darmstadt GL, et al. Effect of community-based newborn-care intervention package implemented through two service-delivery strategies in Sylhet district, Bangladesh: a cluster-randomised controlled trial. *Lancet* 2008;371:1936-44.
3. Rahmathullah L, Tielsch JM, Thulasiraj RD, et al. Impact of supplementing newborn infants with vitamin A on early infant mortality: community based randomised trial in southern India. *BMJ* 2003;327:254.
4. Christian P, West KP, Khatri SK, et al. Effects of maternal micronutrient supplementation on fetal loss and infant mortality: a cluster-randomized trial in Nepal. *The American Journal of Clinical Nutrition* 2003;78:1194-202.
5. Osrin D, Vaidya A, Shrestha Y, et al. Effects of antenatal multiple micronutrient supplementation on birthweight and gestational duration in Nepal: double-blind, randomised controlled trial. *Lancet* 2005;365:955-62.
6. Tielsch JM, Darmstadt GL, Mullany LC, et al. Impact of newborn skin-cleansing with chlorhexidine on neonatal mortality in southern Nepal: a community-based, cluster-randomized trial. *Pediatrics* 2007;119:e330-40.
7. Bhutta ZA, Rizvi A, Raza F, et al. A comparative evaluation of multiple micronutrient and iron-folic acid supplementation during pregnancy in Pakistan: impact on pregnancy outcomes. *Food and Nutrition Bulletin* 2009;30:S496-505.
8. Adair LS. Low birth weight and intrauterine growth retardation in Filipino infants. *Pediatrics* 1989;84:613-22.
9. Isaranurug S, Mo-suwan L, Choprapawon C. A population-based cohort study of effect of maternal risk factors on low birthweight in Thailand. *J Med Assoc Thai* 2007;90:2559-64.
10. Roberfroid D, Huybregts L, Lanou H, et al. Effects of maternal multiple micronutrient supplementation on fetal growth: a double-blind randomized controlled trial in rural Burkina Faso. *Am J Clin Nutr* 2008;88:1330-40.
11. Huybregts L, Roberfroid D, Lanou H, et al. Prenatal food supplementation fortified with multiple micronutrients increases birth length: a randomized controlled trial in rural Burkina Faso. *The American Journal of Clinical Nutrition* 2009;90:1593-600.
12. ter Kuile FO, Terlouw DJ, Kariuki SK, et al. Impact of permethrin-treated bed nets on malaria, anemia, and growth in infants in an area of intense perennial malaria transmission in western Kenya. *The American Journal of Tropical Medicine and Hygiene* 2003;68:68-77.
13. Bland R, Coovadia H, Coutsoodis A, Rollins N, Newell M. Cohort profile: Management of the Africa Center vertical transmission study. *International Journal of Epidemiology* 2010;39:351-60.
14. Fawzi WW, Msamanga GI, Urassa W, et al. Vitamins and perinatal outcomes among HIV-negative women in Tanzania. *The New England Journal of Medicine* 2007;356:1423-31.
15. Schmiegelow C, Minja D, Oesterholt M, et al. Factors associated with and causes of perinatal mortality in northeastern Tanzania. *Acta obstetrica et gynecologica Scandinavica* 2012;91:1061-8.
16. Ndyomugenyi R, Clarke SE, Hutchison CL, Hansen KS, Magnussen P. Efficacy of malaria prevention during pregnancy in an area of low and unstable transmission: an individually-randomised placebo-controlled trial using intermittent preventive treatment and insecticide-treated nets in the Kabale Highlands, southwestern Uganda. *Transactions of the Royal Society of Tropical Medicine and Hygiene* 2011;105:607-16.
17. Victora CG, Barros FC. Cohort profile: the 1982 Pelotas (Brazil) birth cohort study. *International Journal of Epidemiology* 2006;35:237-42.
18. Victora CG, Hallal PC, Araujo CL, Menezes AM, Wells JC, Barros FC. Cohort profile: the 1993 Pelotas (Brazil) birth cohort study. *International Journal of Epidemiology* 2008;37:704-9.
19. Santos IS, Barros AJ, Matijasevich A, Domingues MR, Barros FC, Victora CG. Cohort profile: the 2004 Pelotas (Brazil) birth cohort study. *Int J Epidemiol* 2011;40:1461-8.
20. Gonzalez R, Meriardi M, Lincetto O, et al. Reduction in neonatal mortality in Chile between 1990 and 2000. *Pediatrics* 2006;117:e949-54.
21. Caulfield LE, Zavaleta N, Figueroa A, Leon Z. Maternal zinc supplementation does not affect size at birth or pregnancy duration in Peru. *The Journal of Nutrition* 1999;129:1563-8.
22. Alexander GR, Himes JH, Kaufman RB, Mor J, Kogan M. A United States national reference for fetal growth. *Obstetrics and Gynecology* 1996;87:163-8.
23. Zhou LM, Yang WW, Hua JZ, Deng CQ, Tao X, Stoltzfus RJ. Relation of hemoglobin measured at different times in pregnancy to preterm birth and low birth weight in Shanghai, China. *American Journal of Epidemiology* 1998;148:998-1006.
24. Eneroth H, El Arifeen S, Persson LA, et al. Duration of exclusive breast-feeding and infant iron and zinc status in rural Bangladesh. *The Journal of Nutrition* 2009;139:1562-7.

25. Zeng L, Yan H, Cheng Y, Dibley MJ. Modifying effects of wealth on the response to nutrient supplementation in pregnancy on birth weight, duration of gestation and perinatal mortality in rural western China: double-blind cluster randomized controlled trial. *International Journal of Epidemiology* 2011;40:350-62.
26. Sebayang SK, Dibley MJ, Kelly P, Shankar AV, Shankar AH. Modifying effect of maternal nutritional status on the impact of maternal multiple micronutrient supplementation on birthweight in Indonesia. *European Journal of Clinical Nutrition* 2011;65:1110-7.
27. Osendarp SJ, van Raaij JM, Arifeen SE, Wahed M, Baqui AH, Fuchs GJ. A randomized, placebo-controlled trial of the effect of zinc supplementation during pregnancy on pregnancy outcome in Bangladeshi urban poor. *The American Journal of Clinical Nutrition* 2000;71:114-9.
28. Arifeen SE, Black RE, Caulfield LE, Antelman G, Baqui AH. Determinants of infant growth in the slums of Dhaka: size and maturity at birth, breastfeeding and morbidity. *European Journal of Clinical Nutrition* 2001;55:167-78.
29. Shah A, Faundes A, Machoki M, et al. Methodological considerations in implementing the WHO Global Survey for Monitoring Maternal and Perinatal Health. *Bulletin of the World Health Organization* 2008;86:126-31.
30. Inter-agency Group for Child Mortality Estimation (IGME). (Accessed October 13, 2012, at [http://www.childinfo.org/mortality\\_igme.html](http://www.childinfo.org/mortality_igme.html).)
31. UNICEF. *State of the World's Children 2010*. New York; 2010.
32. Katz J, Lee AC, Kozuki N, Lawn J, Cousens S, Blencowe H, Ezzati M, Bhutta Z, et al. Born too small or too soon: a pooled analysis of mortality risk among preterm and small-for-gestational-age infants in low- and middle-income countries. *Lancet* 2013.
33. Blencowe H, Cousens S, Oestergaard MZ, et al. National, regional, and worldwide estimates of preterm birth rates in the year 2010 with time trends since 1990 for selected countries: a systematic analysis and implications. *Lancet* 2012;379:2162-72.
